# Supplementary material
Source: publisher site journal article supplement (https://www.degruyterbrill.com/publication/isbn/9783486710663/downloadAsset/9783486710663_Anwendungen--de.zip)
Supplement: Supplementary file 1 [file A_0601_Urliste_Verteilung.xls]

## Sheet: Übung
Lageparameter aus Urliste und Verteilung												Lageparameter aus Urliste und Verteilung							Übung			3 Übungen (4=Reserve)
(sortierte) Urliste			Häufigkeitsverteilung									(sortierte) Urliste			Häufigkeitsverteilung							1	2	3	4
i'	xi'		j	xj	fj	Fj	xjfj					i'	xi'		j	xj	fj	Fj	xjfj			xi'	xi'	xi'	xi'
1	1		1									1	1		1	1	7	7	7			1	1	1	1
2	1		2									2	1		2	2	1	8	2		EXCEL	1	2	1	1
3	1		3									3	1		3	3	3	11	9		Funktions-	1	2	1	1
4	1		4									4	1		4	4	2	13	8		Assistent	1	2	2	2
5	1		5									5	1		5	5	2	15	10			1	3	2	2
6	1		Summe	-	0	-	0					6	1		Summe	-	15		36			1	3	2	2
7	1											7	1									1	3	3	3
8	2		Modalwert MD		fD = max(fj)		=> MD =					8	2		Modalwert MD		fD = max(fj)	7	==> MD =		1	2	3	3	3
9	3											9	3									3	3	3	3
10	3		Median			x8	=> Z =					10	3		Median			x8	==> Z =		2	3	3	4	4
11	3											11	3									3	3	4	4
12	4											12	4									4	4	4	4
13	4	Arithmetisches										13	4	Arithmetisches			36			36	2.4	4	4	5	5
14	5											14	5									5	4	5	5
15	5	Mittel										15	5	Mittel			15			15		5	5	5	5
Summe	36											Summe	36
												Löschen			Variante 1
												Lösch-Tab1	1		Variante 2
												Lösch-Tabx	1		Variante 3
												Lösch G11	1		Variante 4
												Lösch J11	1
												Lösch J13	1
												Lösch F16	1
												Lösch F18	1
												Lösch I16	1
												Lösch I18	1
												Lösch J16	1
												Summe	10

## Sheet: Simulation1
Lageparameter aus Urliste und Verteilung												Variante 1
Urliste			Häufigkeitsverteilung									Variante 2
i	xi		j	xj	fj	Fj	xjfj					Variante 3	xi	xi	xi
1	1		1	1	4	4	4						1	1	1
2	1		2	2	3	7	6						1	1	1
3	1		3	3	2	9	6						1	1	2
4	1		4	4	1	10	4						1	1	2
5	2		5	5	5	15	25						2	2	3
6	2		Summe	-	15	-	45						2	2	3
7	2												2	2	3
8	3		Modalwert MD		fD = max(fj)	5	=> MD =		5				3	2	4
9	3												3	3	5
10	4		Median		bzw.		=> Z =		3				4	3
11	5												5	3
12	5												5	3
13	5	Arithmetisches			45			45	3				5	4
14	5												5	4
15	5	Mittel			15			15					5	4
Summe	45

## Sheet: Simulation2
Lageparameter aus der Urliste												Variante 1
Urliste												Variante 2
i	xi											Variante 3	xi	xi	xi
1	1												1	1	1
2	1												1	1	1
3	1												1	1	2
4	1												1	1	2
5	2												2	2	3
6	2												2	2	3
7	2												2	2	3
8	3		Modalwert MD		5								3	2	4
9	3												3	3	5
10	4		Median		bzw.		=> Z =		3				4	3
11	5												5	3
12	5												5	3
13	5		Arithmetisches			45	=	3					5	4
14	5												5	4
15	5		Mittel			15							5	4
Summe	45
