# Supplementary material
Source: publisher site journal article supplement (https://www.degruyterbrill.com/publication/isbn/9783486710663/downloadAsset/9783486710663_Anwendungen--de.zip)
Supplement: Supplementary file 2 [file A_0602_Verteilungstabelle.xls]

## Sheet: Übung
Verteilungstabelle										Verteilungstabelle						Übung	1,2,3	fj			xj
j	xj	fj	Fj	hj	Hj	hj'	H'j			j	xj	fj	Fj	hj	Hj	hj'	H'j	ü1	ü2	ü3	ü1	ü2	ü3
1	2	4								1	2	4	4	0.2	0.2	20	20	4	2	10	2	1	3
2	3	4								2	3	4	8	0.2	0.4	20	40	4	4	8	3	2	4
3	4	4								3	4	4	12	0.2	0.6	20	60	4	8	4	4	3	5
4	5	4								4	5	4	16	0.2	0.8	20	80	4	4	8	5	4	6
5	6	4								5	6	4	20	0.2	1	20	100	4	2	10	6	5	7
Summe	-	20	-	0	-	0	-			Summe	-	20	-	1	-	100	-
										Variante 1
										Variante 2
										Variante 3

## Sheet: Simulation
Verteilungstabelle										Variante 1
j	xj	fj	Fj	hj	Hj	hj'	H'j			Variante 2	fj	fj	fj
1	2	6	6	0.15	0.15	15	15			Variante 3	3	2	8
2	3	9	15	0.225	0.375	22.5	37.5				3	3	6
3	4	12	27	0.3	0.675	30	67.5				3	4	4
4	5	8	35	0.2	0.875	20	87.5				3	3	2
5	6	5	40	0.125	1	12.5	100				3	2	8
Summe	-	40	-	1	-	100	-
