# Supplementary material
Source: publisher site journal article supplement (https://www.degruyterbrill.com/publication/isbn/9783486710663/downloadAsset/9783486710663_Anwendungen--de.zip)
Supplement: Supplementary file 3 [file A_0603_Kumulierte_Verteilung_diskret.xls]

## Sheet: Simulation
(Kumulierte) Verteilung - diskret
j	xj	fj	Fj	hj	Hj								j	xj	fj	hj	Hj	Variante 1	fj	fj	fj
1	1	5	5	0.2	0.2									0				Variante 2	5	5	5
2	2	5	10	0.2	0.4									0			0	Variante 3	5	10	10
3	3	5	15	0.2	0.6									1		0	0		5	15	25
4	4	5	20	0.2	0.8									1		0.2			5	25	10
5	5	5	25	0.2	1									1			0.2		5	45	5
Summe	-	25	-	1	-									2		0	0.2
														2		0.2
	Erläuterungen													2			0.4
		Fj = Fj-1 + fj												3		0	0.4
		hj = fj / n												3		0.2
		Hj = Fj / n												3			0.6
														4		0	0.6
														4		0.2
														4			0.8
														5		0	0.8
														5		0.2
														5			1
														6			1
														6
														6
													Su.	-	0
