# Supplementary material
Source: publisher site journal article supplement (https://www.degruyterbrill.com/publication/isbn/9783486710663/downloadAsset/9783486710663_Anwendungen--de.zip)
Supplement: Supplementary file 4 [file A_0604_Kumulierte_Verteilung_stetig.xls]

## Sheet: Simulation
(Kumulierte) Verteilung - stetig																	Ogive
j	xj	fj	hj	Hj												1	0.5	0	Variante 1	fj	fj	fj	fj
1	2000	5	0.142857	0.142857												2	1.5	0.142857	Variante 2	5	5	5	2
2	3000	5	0.142857	0.285714												3	2.5	0.285714	Variante 3	5	10	15	3
3	4000	5	0.142857	0.428571												4	3.5	0.428571	Variante 4	5	15	25	5
4	5000	5	0.142857	0.571429												5	4.5	0.571429		5	25	10	7
5	6000	5	0.142857	0.714286												6	5.5	0.714286		5	15	8	8
6	7000	5	0.142857	0.857143												7	6.5	0.857143		5	10	5	25
7	8000	5	0.142857	1												8	7.5	1		5	5	2	85
Summe	-	35	1	-
	Erläuterungen
	hj = fj / n
	Hj = Hj-1 + hj
