# Supplementary material
Source: publisher site journal article supplement (https://www.degruyterbrill.com/publication/isbn/9783486710663/downloadAsset/9783486710663_Anwendungen--de.zip)
Supplement: Supplementary file 5 [file A_0605_Kreisdiagramm.xls]

## Sheet: Simulation
Kreisdiagramm												Variante 1
j	xj	fj	hj	Winkel								Variante 2	fj	fj	fj
												Variante 3
1	A	20	0.2	72									20	8	25
2	B	20	0.2	72									20	6	2
3	C	20	0.2	72									20	4	3
4	D	20	0.2	72									20	3	4
5	E	20	0.2	72									20	2	6
Summe		100	1	360
	Erläuterung
