# Supplementary material
Source: publisher site journal article supplement (https://www.degruyterbrill.com/publication/isbn/9783486710663/downloadAsset/9783486710663_Anwendungen--de.zip)
Supplement: Supplementary file 6 [file A_0606_Verteilungsvergleich.xls]

## Sheet: Simulation1
Vergleich zweier Verteilungen (absolut)												Variante 1
j	xj	fj (A)	fj (B)									Variante 2	fj	gj	fj	gj	fj	gj
1	2	16	6									Variante 3	16	6	9	18	1	15
2	3	13	6										13	6	8	19	4	8
3	4	6	8										6	8	9	19	16	2
4	5	5	10										5	10	9	18	3	5
5	6	4	14										4	14	8	18	9	15
6	7	4	18										4	18	9	19	12	12
7	8	2	18										2	18	8	19	5	7
Summe	-	50	80

## Sheet: Simulation2
Vergleich zweier Verteilungen (relativ)												Variante 1
j	xj	fj (A)	fj (B)	hj (A)	hj (B)							Variante 2	fj	gj	fj	gj	fj	gj
1	2	16	6	0.32	0.075							Variante 3	16	6	9	18	1	15
2	3	13	6	0.26	0.075								13	6	8	19	4	8
3	4	6	8	0.12	0.1								6	8	9	19	16	2
4	5	5	10	0.1	0.125								5	10	9	18	3	5
5	6	4	14	0.08	0.175								4	14	8	18	9	15
6	7	4	18	0.08	0.225								4	18	9	19	12	12
7	8	2	18	0.04	0.225								2	18	8	19	5	7
Summe	-	50	80	1	1
