# Supplementary material
Source: publisher site journal article supplement (https://www.degruyterbrill.com/publication/isbn/9783486710663/downloadAsset/9783486710663_Anwendungen--de.zip)
Supplement: Supplementary file 7 [file A_0701_Klassierung_Histogramm.xls]

## Sheet: Simulation
Klassierung und Histogramm
j	K-Untergr.	K-Obergr.	K-breite	fj	fj*		i	xi					1	0		Variante 1	K-Obergr.	K-Obergr.	K-Obergr.	i	xi	xi	xi
	von aj	bis unter bj	bj - aj				1	4				19	2	0		Variante 2	bj	bj	bj	1	4	4	4
1	0	20	20	8	0.4		2	5				39	3	20	0	Variante 3	20	10	15	2	5	4	4
2	20	40	20	7	0.35		3	7				59	4	20	0.4	Variante 4	40	20	25	3	7	4	4
3	40	60	20	5	0.25		4	7					5	20	0.4	Variante 5				4	7	5	5
Summe	-	-	-	20	-		5	12					6	40	0					5	12	5	5
							6	14					7	40	0.35					6	14	6	6
							7	15					8	40	0.35					7	15	6	6
							8	18					9	60	0					8	18	7	7
							9	25					10	60	0.25					9	25	17	17
							10	27					11	60	0.25					10	27	18	18
							11	31					12	60	0					11	31	31	31
							12	32												12	32	32	32
							13	33												13	33	33	33
							14	35												14	35	35	35
							15	38												15	38	38	38
							16	42												16	42	42	42
							17	47												17	47	47	47
							18	52												18	52	52	52
							19	53												19	53	53	53
							20	58												20	58	58	58
