# Supplementary material
Source: publisher site journal article supplement (https://www.degruyterbrill.com/publication/isbn/9783486710663/downloadAsset/9783486710663_Anwendungen--de.zip)
Supplement: Supplementary file 8 [file A_0702_Sulen-Histogramm.xls]

## Sheet: Simulation
Säulen-Histogramm für klassierte Verteilungen
j	aj bis unter bj	fj	Fj								0.5	0	Variante 1	fj	fj	fj
1	0 bis unter 20	30	30								1.5	30	Variante 2	30	10	50
2	20 bis unter 40	30	60								2.5	60	Variante 3	30	30	30
3	40 bis unter 60	30	90								3.5	90		30	50	10
Summe	-	90	-
