# Supplementary material
Source: publisher site journal article supplement (https://www.degruyterbrill.com/publication/isbn/9783486710663/downloadAsset/9783486710663_Anwendungen--de.zip)
Supplement: Supplementary file 9 [file A_0703_Histogramm.xls]

## Sheet: Simulation1
Histogramm
j	aj	bj	K-breite	fj	fj*	i	xi						1	0	0		xi	xi	xi
1	0	10	10	5	0.5	1	5				10	9	2	0	0.5		5	3	5
2	10	20	10	5	0.5	2	5				10	19	3	10	0.5	10	5	4	8
3	20	30	10	5	0.5	3	5				10	29	4	10	0	20	5	5	12
4	30	40	10	5	0.5	4	5				10	39	5	10	0.5	30	5	6	13
5	40	50	10	5	0.5	5	5				10	49	6	20	0.5	40	5	7	14
Summe	-	-	-	25	-	6	15						7	20	0	50	15	13	18
						7	15						8	20	0.5	Variante 1	15	14	23
						8	15						9	30	0.5	Variante 2	15	15	24
						9	15						10	30	0	Variante 3	15	16	26
						10	15						11	30	0.5		15	17	26
						11	25						12	40	0.5		25	23	27
						12	25						13	40	0		25	24	27
						13	25						14	40	0.5		25	25	28
						14	25						15	50	0.5		25	26	29
						15	25						16	50	0		25	27	33
						16	35										35	33	35
						17	35										35	34	36
						18	35										35	35	36
						19	35										35	36	38
						20	35										35	37	38
						21	45										45	43	42
						22	45										45	44	43
						23	45										45	45	48
						24	45										45	46	48
						25	45										45	47	49

## Sheet: Simulation2
Histogramm
j	aj	bj	K-breite	fj	fj*								1	0	0
1	0	10	10	6	0.6						10	9	2	0	0.6	10	5	4	6	6	6
2	10	20	10	36	3.6						10	19	3	10	0.6	20	20	10	36	36	36
3	20	30	10	39	3.9						10	29	4	10	0	30	25	12	39	39	39
4	30	40	10	30	3						10	39	5	10	3.6	40	30	15	30	30	30
5	40	50	10	9	0.9						10	49	6	20	3.6	50	45	18	9	9	9
Summe	-	-	-	120	-								7	20	0	Variante 1
													8	20	3.9	Variante 2
													9	30	3.9	Variante 3
													10	30	0
													11	30	3
													12	40	3
													13	40	0
													14	40	0.9
													15	50	0.9
													16	50	0
