# Supplementary material
Source: publisher site journal article supplement (https://www.degruyterbrill.com/publication/isbn/9783486710663/downloadAsset/9783486710663_Anwendungen--de.zip)
Supplement: Supplementary file 10 [file A_0801_Quantile_Minimum_Maximum.xls]

## Sheet: Simulation
Quantile, Minimum, Maximum												Variante 1	Variante 1		Variante 2		Variante 3
i	xi	Minimum	1									Variante 2	i	xi	i	xi	i	xi
1	1	10%-Quantil	1.9									Variante 3	1	1	1	1	1	1
2	2												2	2	2	2	2	1
3	3			xj	fj	Fj	Hj'						3	3	3	2	3	1
4	3	20%-Quantil	2.8										4	3	4	3	4	2
5	4			1	1	1	10						5	4	5	3	5	2
6	4			2	1	2	20						6	4	6	3	6	2
7	5	25%-Quantil	3	3	2	4	40						7	5	7	4	7	3
8	5			4	2	6	60						8	5	8	4	8	3
9	6			5	2	8	80						9	6	9	4	9	4
10	7	50%-Quantil	4	6	1	9	90						10	7	10	5	10	4
11				7	1	10	100						11		11	5	11	5
12				8	0	10	100						12		12	5	12	5
13		75%-Quantil	5	9	0	10	100						13		13	6	13	6
14				10	0	10	100						14		14	6	14	6
15				Summe	10	-	-						15		15	6	15	7
16		90%-Quantil	6.1										16		16	6	16	8
17													17		17	6	17	9
18													18		18	7	18	9
19		Maximum	7										19		19	7	19	9
20													20		20	7	20	10
