# Supplementary material
Source: publisher site journal article supplement (https://www.degruyterbrill.com/publication/isbn/9783486710663/downloadAsset/9783486710663_Anwendungen--de.zip)
Supplement: Supplementary file 12 [file A_0803_Arithmetisches_Mittel_Tabelle.xls]

## Sheet: Übung
Arithmetisches Mittel												Arithmetisches Mittel				Übung	1		fj
j	xj	fj	xjfj	hj	xjhj							j	xj	fj	xjfj	hj	xjhj	xj	ü1	ü2	ü2
1	2	4										1	2	4	8	0.2	0.4	2	4	2	7
2	3	4										2	3	4	12	0.2	0.6	3	4	4	5
3	4	4										3	4	4	16	0.2	0.8	4	4	8	4
4	5	4										4	5	4	20	0.2	1	5	4	4	3
5	6	4										5	6	4	24	0.2	1.2	6	4	2	1
Summe	-	20	0	0	0							Summe	-	20	80	1	4
	Arithm. Mittel												Arithm. Mittel			80	4
	(mit fj)												(mit fj)			20
	Arithm. Mittel												Arithm. Mittel			4	4
	(mit hj)												(mit hj)			1
												Lösch E10	1	Variante 1
												Lösch E12	1	Variante 2
												Summe	2	Variante 3

## Sheet: Simulation
Arithmetisches Mittel									Variante 1
j	xj	fj	xjfj	hj	xjhj				Variante 2	fj	fj	fj
1	2	200	400	0.307692	0.615385				Variante 3	200	19	2
2	3	100	300	0.153846	0.461538					100	20	4
3	4	50	200	0.0769231	0.307692					50	19	7
4	5	100	500	0.153846	0.769231					100	20	10
5	6	200	1200	0.307692	1.84615					200	19	325
Summe	-	650	2600	1	4					xj	xj	xj
										2	2	2
	Arithm. Mittel			2600	4					3	3	3
										4	4	4
	(mit fj)			650						5	5	5
										6	6	6
	Arithm. Mittel			4
	(mit hj)
