# Supplementary material
Source: publisher site journal article supplement (https://www.degruyterbrill.com/publication/isbn/9783486710663/downloadAsset/9783486710663_Anwendungen--de.zip)
Supplement: Supplementary file 13 [file A_0804_Lageparameter_Sulendiagramm.xls]

## Sheet: Simulation
Lageparameter und Säulendiagramm																MEDIAN-Berechnung:
j	xj	fj	Fj	xjfj	Hj								Nebenrechn.								Variante 1	fj	fj	fj
1	1	9	9	9	0.428571								1				99	99			Variante 2	9	4	14
2	2	4	13	8	0.619048												99	2	2		Variante 3	4	7	7
3	3	4	17	12	0.809524												99	3	3			4	14	4
4	4	3	20	12	0.952381										Leer c3:c7		99	4	4			3	7	8
5	5	1	21	5	1										1		99	5	5			1	4	13
Summe		21		46									9		1	0	99	2	Min
															1		50.5		2	10.5
															1
	Modalwert		1												1	1
															5	2
	Zentralwert		2													2.19048
														10.5	y
	Arithm. Mittel		2.19048										2		0.5
													3
													4
													5
