# Supplementary material
Source: publisher site journal article supplement (https://www.degruyterbrill.com/publication/isbn/9783486710663/downloadAsset/9783486710663_Anwendungen--de.zip)
Supplement: Supplementary file 14 [file A_0805_Lageparameter_Stabdiagramm.xls]

## Sheet: Simulation
Lageparameter und Stabdiagramm (mit Ausreißer)																							Variante 1
j	xj	fj	xjfj	Fj	Hj								j	xj	fj	hj	Hj		Median	Modw.			Variante 2
1	1	8	8	8	0.258065									0			0			1			Variante 3	1	8	1	13	1	5
2	2	6	12	14	0.451613									1			0							2	6	2	13	2	5
3	3	6	18	20	0.645161									1		0	0		3					3	6	3	13	3	5
4	4	3	12	23	0.741935									1		8			4					4	3	4	13	4	5
5	5	5	25	28	0.903226									1			0.1		5					5	5	5	13	5	5
6	6	3	18	31	1									2		0	0.1		6					6	3	6	13	6	5
7	7	0		31	1									2		6								7	0	18	1	18	1
Summe		31	93											2			6			8
														3		0	6		1
	Modalwert			1										3		6			3
	Zentralwert			3										3			12		3
	Arithm. Mittel			3										4		0	12
														4		3		MEDIAN-Berechnung:
														4			15
														5		0	15		99	99
														5		5			99	99
														5			20		99	3	3
														6		0	20		99	4	4
														6		3			99	5	5
														6			23		99	6	6
														7		0	23		99	7	7
														7		0		0	99	3	Min	N/2:
														7			23		51		3	15.5
														8			23
														8			23
													Su.	-	0
