# Supplementary material
Source: publisher site journal article supplement (https://www.degruyterbrill.com/publication/isbn/9783486710663/downloadAsset/9783486710663_Anwendungen--de.zip)
Supplement: Supplementary file 15 [file A_0806_Lageparameter_klassiert_gleich .xls]

## Sheet: Simulation
Lageparameter: gleiche Klassenbreiten											MEDIAN-Berechnung:								Variante 1
j	xj	fj	xjfj	Fj	hj	Hj										Mod.wert	0.5	0	Variante 2	fj	fj	fj
1	1	25	25	25	0.2	0.2						99	99			1	1.5	0.2	Variante 3	25	1	90
2	2	25	50	50	0.2	0.4						99	99			2	2.5	0.4		25	4	4
3	3	25	75	75	0.2	0.6						99	3	3		3	3.5	0.6		25	8	3
4	4	25	100	100	0.2	0.8						99	4	4		4	4.5	0.8		25	30	2
5	5	25	125	125	0.2	1						99	5	5		5	5.5	1		25	98	1
Summe	-	125	375	-	1	-					0	99	3	Min	N/2:	25
												51		3	62.5
	Zentralwert		3									3
												3
	Arithm. Mittel		3
