# Supplementary material
Source: publisher site journal article supplement (https://www.degruyterbrill.com/publication/isbn/9783486710663/downloadAsset/9783486710663_Anwendungen--de.zip)
Supplement: Supplementary file 16 [file A_0807_Lageparameter_Histogramm.xls]

## Sheet: Simulation1
Lageparameter und Histogramm
j	von	bis unter	bj - aj	mj	fj	fj*	mjfj	i	j	xi							Variante 1	Variante 2	Variante 3	Variante 1
	aj	bj						1	1	2				1	0	0	2	2	9	Variante 2
1	0	10	10	5	7	0.7	35	2		3			9	2	0	0.7	3	2	9	Variante 3
2	10	20	10	15	7	0.7	105	3		4			19	3	10	0.7	4	2	9
3	20	30	10	25	7	0.7	175	4		5			29	4	10	0	5	3	9
Su.	-	-	-	-	21	-	315	5		6				5	10	0.7	6	3	9
								6		7				6	20	0.7	7	3	9
								7		8				7	20	0	8	3	9
								8	2	12				8	20	0.7	12	12	19
								9		13				9	30	0.7	13	12	19
								10		14				10	30	0	14	13	19
	15							11		15				11	30	#REF!	15	13	19
								12		16				12	#REF!	#REF!	16	13	19
								13		17				13	#REF!	0	17	13	19
								14		18				14	#REF!	#REF!	18	13	19
								15	3	22				15	#REF!	#REF!	22	21	29
	15							16		23				16	#REF!	0	23	22	29
								17		24							24	23	29
								18		25							25	23	29
								19		26							26	23	29
								20		27							27	23	29
								21		28							28	23	29
								Su.		315

## Sheet: Simulation2
Lageparameter und Histogramm
j	von	bis unter	bj - aj	mj	fj	fj*	mjfj	ajfj	bjfj								Variante 1	Variante 2	Variante 3	Variante 1
	aj	bj												1	0	0	10	5	5	Variante 2
1	0	10	10	5	5	0.5	25	0	50				9	2	0	0.5	20	10	10	Variante 3
2	10	20	10	15	5	0.5	75	50	100				19	3	10	0.5	30	20	20
3	20	30	10	25	5	0.5	125	100	150				29	4	10	0	40	30	30
4	30	40	10	35	5	0.5	175	150	200					5	10	0.5	50	50	50
5	40	50	10	45	5	0.5	225	200	250					6	20	0.5
Su.	-	-	-	-	25	-	625	500	750					7	20	0
														8	20	0.5	5	18	20
														9	30	0.5	5	34	20
														10	30	0	5	86	20
	25		20											11	30	0.5	5	66	20
														12	40	0.5	5	96	20
														13	40	0
														14	40	0.5
														15	50	0.5
			30											16	50	0
															50	-
