# Supplementary material
Source: publisher site journal article supplement (https://www.degruyterbrill.com/publication/isbn/9783486710663/downloadAsset/9783486710663_Anwendungen--de.zip)
Supplement: Supplementary file 17 [file A_0808_Geometrisches_Mittel.xls]

## Sheet: Simulation
Geometrisches Mittel																Variante 1
JAHR	1990	1991	1992	1993	1994	1995	1996	1997	1998	1999					91	Variante 2	JAHR	1990	1991	1992	1993	1994	1995	1996	1997	1998	1999
															92	Variante 3
Y	100	110	120	130	140	150	160	170	180	200					93	Variante 4	Y	100	110	120	130	140	150	160	170	180	200
															94
															95
Wt-faktor	_	1.1	1.09091	1.08333	1.07692	1.07143	1.06667	1.0625	1.05882	1.11111				8.00597	96		Y	100	100	100	150	150	200	200	200	200	250
														0.5	97
Wt-rate	_	10	9.09091	8.33333	7.69231	7.14286	6.66667	6.25	5.88235	11.1111					98
															99		Y	100	90	80	120	150	100	120	100	80	70
Geometr.		1991	1992	1993	1994	1995	1996	1997	1998	1999
Mittel																	Y	2	4	8	16	32	64	128	256	512	1024
1.08006
Durchschn.
Wt.rate
in %
8.00597
