# Supplementary material
Source: publisher site journal article supplement (https://www.degruyterbrill.com/publication/isbn/9783486710663/downloadAsset/9783486710663_Anwendungen--de.zip)
Supplement: Supplementary file 19 [file A_0902_Durchschn_Absolute_Abweichung.xls]

## Sheet: Simulation
Durchschnittliche absolute Abweichung										Variante 1	Variante 1	Variante 2	Variante 3
j	xj	fj	xjfj							Variante 2	fj	fj	fj
1	2	5	10	3	15					Variante 3	5	9	12
2	3	5	15	2	10						5	2
3	4	5	20	1	5						5	3	12
4	5	5	25	0	0						5	1
5	6	5	30	1	5						5	3
6	7	5	35	2	10						5	2
7	8	5	40	3	15						5	9
Summe	-	35	175	-	60						2	2	2
											3	3	3
			175	=	5						4	4	4
			35								5	5	5
											6	6	6
Ds.Abs.Abw.			60	=	1.71429						7	7	7
			35								8	8	8
