# Supplementary material
Source: publisher site journal article supplement (https://www.degruyterbrill.com/publication/isbn/9783486710663/downloadAsset/9783486710663_Anwendungen--de.zip)
Supplement: Supplementary file 20 [file A_0903_Varianz_Berechnung.xls]

## Sheet: Übung
Varianz																	fj
j	xj	fj	xjfj							xj	fj	xjfj		( - ) 2	( - ) 2 f	xj	Übung 1	Übung 2	Übung 3
1	2	4								2	4	8	-2	4	16	2	4	2	8
2	3	4								3	4	12	-1	1	4	3	4	4	4
3	4	4								4	4	16	x	x	x	4	4	8	2
4	5	4								5	4	20	1	1	4	5	4	4	4
5	6	4								6	4	24	2	4	16	6	4	2	8
Summe	-	20	0	-	-	0				-	20	80	-	10	40
				=						A.M.	Formel	80	=	4
												20
Varianz					=				Varianz		Var-Formel		40	=	2.10526
													19
									Lösch D10	1	Standardabweichung		std.abw.
	Standardabweichung								Lösch D11	1				1.45095
									Lösch E13	1	Variante 1
									Lösch E14	1	Variante 2
									Summe	4	Variante 3
										k19=4!

## Sheet: Simulation
Varianz									Variante 1
j	xj	fj	xjfj						Variante 2	fj	fj	fj	fj	fj
1	2	1	2	-2	4	4			Variante 3	1	35	35
2	3	3	9	-1	1	3			Variante 4	3	3	35	9	99
3	4	35	140	0	0	0			Variante 5	35	1	35
4	5	3	15	1	1	3				3	3	35	9
5	6	1	6	2	4	4				1	35	35
Summe	-	43	172	-	-	14				2	2	2	2	2
										3	3	3	3	3
			172	=	4					4	4	4	4	4
			43							5	5	5	5	5
										6	6	6	6	6
Varianz				14	=	0.333333
				42
	Standardabweichung			0.57735
