# Supplementary material
Source: publisher site journal article supplement (https://www.degruyterbrill.com/publication/isbn/9783486710663/downloadAsset/9783486710663_Anwendungen--de.zip)
Supplement: Supplementary file 21 [file A_0904_Varianz_Verschiebungssatz.xls]

## Sheet: Simulation
Varianz (mit Verschiebungssatz)													Variante 1
j	xj	fj	xjfj			xj2	xj2fj						Variante 2	fj	fj	fj
1	1	4	4	-3	36	1	4	Varianz =					Variante 3	4		9
2	2	4	8	-2	16	4	16							4		2
3	3	4	12	-1	4	9	36		112					4		9
4	4	4	16	0	0	16	64		28					4	4
5	5	4	20	1	4	25	100		4					4
6	6	4	24	2	16	36	144							4	4
7	7	4	28	3	36	49	196							4
Su.		28	112		112	-	560							1	1	1
														2	2	2
					Varianz:									3	3	3
Ar. Mittel	4				4	=	560	-	16					4	4	4
St.abw.	2						28							5	5	5
						=	20	-	16					6	6	6
														7	7	7
