# Supplementary material
Source: publisher site journal article supplement (https://www.degruyterbrill.com/publication/isbn/9783486710663/downloadAsset/9783486710663_Anwendungen--de.zip)
Supplement: Supplementary file 22 [file A_0905_Durchschn_Streubereich.xls]

## Sheet: Simulation
Durchschnittlicher Streubereich														Variante 1
j	xj	fj	xjfj											Variante 2	fj	fj	fj	fj
														Variante 3
1	1	8	8	-2	32									Variante 4	8	4	15	18
2	2	8	16	-1	8										8	8	4
3	3	8	24	0	0								0	1.56777	8	16	2	18
4	4	8	32	1	8								0	4.43223	8	8	4
5	5	8	40	2	32								A.Mittel	3	8	4	15
Su.		40	120	-	80
	Arithm. Mittel			3
	Varianz			2.05128
	Standardabw.			1.43223
