# Supplementary material
Source: publisher site journal article supplement (https://www.degruyterbrill.com/publication/isbn/9783486710663/downloadAsset/9783486710663_Anwendungen--de.zip)
Supplement: Supplementary file 23 [file A_0906_Streuungszerlegung.xls]

## Sheet: Simulation1
Streuungszerlegung (Klassen)
j	von	bis unter	Nj						i	j	xi			Variante 1	Variante 1	Variante 2	Variante 3
	aj	bj							1	1	2			Variante 2	2	5	1
1	0	10	6	4.5	2.91667	17.5	-10	600	2		3			Variante 3	3	5	9
2	10	20	6	14.5	2.91667	17.5	0	0	3		4			Variante 4	4	5
3	20	30	6	24.5	2.91667	17.5	10	600	4		5			Variante 5	5	5
Su.			18			52.5		1200	5		6			Variante 6	6	5
									6		7				7	5
					?			14.5	7	2	12				12	15	11
									8		13				13	15	19
								8.34166	9		14				14	15
									10		15				15	15
								69.5833	11		16				16	15
									12		17				17	15
	Binnenklassen-		+	Zwischenklassen-					13	3	22				22	25	21
	streuung			streuung					14		23				23	25	29
									15		24				24	25
Varianz	=	52.5	+	1200	=				16		25				25	25
		18		18					17		26				26	25
	=	2.91667	+	66.6667	=	69.5833			18		27				27	25
									Su.		261

## Sheet: Simulation2
Streuungszerlegung (Gruppen)
j	von	bis unter	Nj						i	j	xi			Variante 1	Variante 1	Variante 2	Variante 3
	aj	bj							1	1	1			Variante 2	1	1	1
1	a1	b1	3	2	0.666667	2	-1	3	2		2			Variante 3	2	2	1
2	a2	b2	3	3	0.666667	2	0	0	3		3			Variante 4	3	3	2
3	a3	b3	3	4	0.666667	2	1	3	4					Variante 5			2
Su.			9			6		6	5					Variante 6			3
									6								4
					?			3	7	2	2				2	1	1
									8		3				3	2	2
								1.1547	9		4				4	3	2
									10								3
								1.33333	11								4
									12								5
	Binnenklassen-		+	Zwischenklassen-					13	3	3				3	1	2
	streuung			streuung					14		4				4	2	3
									15		5				5	3	3
Varianz	=	6	+	6	=				16								4
		9		9					17								5
	=	0.666667	+	0.666667	=	1.33333			18								5
									Su.		27
