# Supplementary material
Source: publisher site journal article supplement (https://www.degruyterbrill.com/publication/isbn/9783486710663/downloadAsset/9783486710663_Anwendungen--de.zip)
Supplement: Supplementary file 24 [file A_0907_Variationskoeffizient.xls]

## Sheet: Simulation
Variationskoeffizient																							Variante 1
j	xj	fj	xjfj										j	xj	fj	hj	Hj						Variante 2
1	1	8	8	32										0			0						Variante 3	1	8	11	8	11	1
2	2	8	16	8										1			0							2	8	12	8	12	3
3	3	8	24	0										1		0	0							3	8	13	8	13	8
4	4	8	32	8										1		8								4	8	14	8	14	3
5	5	8	40	32										1			0.1							5	8	15	8	15	1
6														2		0	0.1
7														2		8
8														2			8		Ar.Mittel
Su.		40	120	80										3		0	8		3
														3		8			Streubereich
	Arithm. Mittel			3										3			16		1.56777	4.43223
	Standardabw.			1.43223										4		0	16		0	0
	Variationskoeff. (%)			47.741										4		8
														4			24
														5		0	24
														5		8
														5			32
														0		0
														0		0
														0
														0		0
														0		0
														0
														0		0
														0		0
														0
