# Supplementary material
Source: publisher site journal article supplement (https://www.degruyterbrill.com/publication/isbn/9783486710663/downloadAsset/9783486710663_Anwendungen--de.zip)
Supplement: Supplementary file 25 [file A_1001_Schiefe.xls]

## Sheet: Simulation
Schiefe																			Variante 1
j	xj	fj	xjfj	Summand	Summand								j	xj	fj	hj	Hj		Variante 2	xj	fj	xj	fj	xj	fj	xj	fj
				Varianz	Schiefe														Variante 3
1	1	9	9	22.3802	-1.73422									0			0		Variante 4	1	9	1	5	1	1	1	8
2	2	8	16	2.66272	-0.0754872									1			0	0	-0.15325	2	8	2	5	2	3	2	8
3	3	5	15	0.89497	0.0186062									1		0	0	0	5.3071	3	5	3	5	3	5	3	8
4	4	3	12	6.07544	0.42485									1		9		0.4		4	3	4	5	4	8	4	8
5	15	1	15	154.333	94.2143									1			0.1	0.4		15	1	10	1	5	9	5	8
Su.		26	67	186.346	92.8481									2		0	0.1
														2		8
	Arithm. Mittel			2.57692										2			8
	Standardabw.			2.73017										3		0	8
	Schiefe SC			4.02342										3		5
														3			13
														4		0	13
														4		3
														4			16
														15		0	16
														15		1
														15			17
													Su.	-	0
