# Supplementary material
Source: publisher site journal article supplement (https://www.degruyterbrill.com/publication/isbn/9783486710663/downloadAsset/9783486710663_Anwendungen--de.zip)
Supplement: Supplementary file 26 [file A_1002_Abs_Konzentration_Herfindahl.xls]

## Sheet: Simulation
Absolute Konzentration (nach Herfindahl)														Variante 1
	i	Wert	Wert-	Wert-	xi2									Variante 2
Element-		xi	anteil	anteil										Variante 3
Name			ai in %	kum.(%)
	0			0									0		Umsatz	Umsatz	Umsatz
A	1	999	99.6012	99.6012	998001								20		999	900	9
B	2	1	0.0997009	99.7009	1								40		1	800	9
C	3	1	0.0997009	99.8006	1								60		1	700	9
D	4	1	0.0997009	99.9003	1								80		1	600	9
E	5	1	0.0997009	100	1								100		1	300	9
Summe	-	1003	100	-	998005
Herfindahl-Index		=	998005	=	0.992044
			1006009
