# Supplementary material
Source: publisher site journal article supplement (https://www.degruyterbrill.com/publication/isbn/9783486710663/downloadAsset/9783486710663_Anwendungen--de.zip)
Supplement: Supplementary file 27 [file A_1003_Rel_Konzentration_Lorenz_Gini.xls]

## Sheet: Simulation
Relative Konzentration (Lorenzkurve + Gini-Koeffizient)														Variante 1
j	xj		fj	hj'	Hj'	mj	mjfj	yj'	Yj'	Y'j-1+Y'j	(Y'j-1+Y'j)hj'			Variante 2	xj		fj	xj		fj	xj		fj
	aj	bj			0				0					Variante 3	aj	bj		aj	bj		aj	bj
1	5	10	1	20	20	7.5	7.5	1.31004	1.31004	1.31004	26.2009				5	10	1	19	20	5	10	10	5
2	10	15	1	20	40	12.5	12.5	2.18341	3.49345	4.80349	96.0699					15	1		21	5		10	5
3	15	20	1	20	60	17.5	17.5	3.05677	6.55022	10.0437	200.873					20	1		22	5		10	5
4	20	25	1	20	80	22.5	22.5	3.93013	10.4803	17.0306	340.611					25	1		23	5		10	5
5	25	1000	1	20	100	512.5	512.5	89.5197	100	110.48	2209.61					1000	1		24	5		10	5
Su.	-	-	5	100	-	-	572.5	100	-	-	2873.36
	Gini-Koeffizient
	= 1 _	2873.36
		10000
	=	0.712664
