# Supplementary material
Source: publisher site journal article supplement (https://www.degruyterbrill.com/publication/isbn/9783486710663/downloadAsset/9783486710663_Anwendungen--de.zip)
Supplement: Supplementary file 28 [file A_1101_Lineartransformation.xls]

## Sheet: Simulation
Lineartransformation																							Variante 1
j	xj	fj	yj														j	xj	yj	fj(x)	fj(y)	Hj	Variante 2	fj		fj		fj		fj
1	2	3	3.91166									xj-xq	yj-yq	axj-xq.f	xj-xq2.fj	6		0	0			0	Variante 3	3		3		1		1
2	3	4	5.86749									-2	-3.91166	6	12	12		1	1			0	Variante 4	4		4		3		3
3	4	5	7.82332									-1	-1.95583	4	4	20		2	3.91166	0	0	0		5		5		5		5
4	5	4	9.77915									0	0	0	0	20		2	3.91166	3	3			4		4		6		6
5	6	3	11.735									1	1.95583	4	4	18		2	3.91166			0.1		3		3		7		9
Su.	-	19	-									2	3.91166	6	12	76		3	5.86749	0	0	0.1
		a =	0									-	-	20	32			3	5.86749	4	4			a =	0	a =	0	a =	32	a =	7
Y = a + b X															4	7.82332		3	5.86749			4
		b =	1.95583												0.1	2.70223		4	7.82332	0	0	4		b =	1.95583	b =	0.51129	b =	1.8	b =	-1
															0.1	5.29777		4	7.82332	5	5
		X	Y												0.2	5.2851		4	7.82332			9
Arithm. Mittel		4	7.82332												0.2	10.3615		5	9.77915	0	0	9					0.511292				0.555556
Standardabw.		1.29777	2.53822															5	9.77915	4	4
																		5	9.77915			13
																		6	11.735	0	0	13
																		6	11.735	3	3
																		6	11.735			16
																		7	12.735	0	0	16
																		7	12.735
																	Su.	-		19
