# Supplementary material
Source: publisher site journal article supplement (https://www.degruyterbrill.com/publication/isbn/9783486710663/downloadAsset/9783486710663_Anwendungen--de.zip)
Supplement: Supplementary file 29 [file A_1102_Standardisierung.xls]

## Sheet: Simulation
Standardisierung																									Variante 1
j	xj	fj	zj																j	xj	zj	fj(x)	fj(z)	Hj	Variante 2	fj	fj	fj
1	1	5	-1.68154											xj-xq	xj-xq2.fj		1.05	5		0	0			0	Variante 3	5	8	15
2	2	9	-0.840771											-2	20		2.05	18		1	1			0		9	8	6
3	3	14	0											-1	9		3.05	42		1.05	-1.68154	0	0	0		14	8	4
4	4	9	0.840771											0	0		4.05	36		1.05	-1.68154	5	5			9	8	3
5	5	5	1.68154											1	9		5.05	25		1.05	-1.68154			0.1		5	8	1
Su.		42												2	20			126		2.05	-0.840771	0	0	0.1
														0	58					2.05	-0.840771	9	9
			xj -	3											xq					2.05	-0.840771			9
			1.18938												3	0.2	1.81062			3.05	0	0	0	9
															zq	0.2	4.18938			3.05	0	14	14
		X	Z												0	0.3	-1			3.05	0			23
Arithm. Mittel		3	0													0.3	1			4.05	0.840771	0	0	23
Standardabw.		1.18938	1																	4.05	0.840771	9	9
																				4.05	0.840771			32
																				5.05	1.68154	0	0	32
																				5.05	1.68154	5	5
																				5.05	1.68154			37
																			Su.	-		42
