# Supplementary material
Source: publisher site journal article supplement (https://www.degruyterbrill.com/publication/isbn/9783486710663/downloadAsset/9783486710663_Anwendungen--de.zip)
Supplement: Supplementary file 30 [file A_1201_Gliederungszahlen.xls]

## Sheet: Übung
Gliederungszahlen										Variante 1	Gliederungszahlen						Variante 1						Gliederungszahlen
Erwerbstätige nach Wirtschaftsbereichen										Variante 2	Erwerbstätige nach Wirtschaftsbereichen						i	Sektor	1970	1980	1990	2000	Erwerbstätige nach Wirtschaftsbereichen
										Variante 3							1	Primär	3	2	1	1
ABSOLUTZAHLEN (in Millionen)											ABSOLUTZAHLEN (in Millionen)						2	Sekundär	3	5	6	7	ABSOLUTZAHLEN (in Millionen)
																	3	Tertiär	3	9	10	12
i	Sektor	1970	1980	1990	2000						i	Sektor	1970	1980	1990	2000	Summe		9	16	17	20	i	Sektor	1970	1980	1990	2000
1	Primär	3	2	1	1						1	Primär	3	2	1	1	Variante 2						1	Primär	3	2	1	1
2	Sekundär	3	5	6	7						2	Sekundär	3	5	6	7	i	Sektor	1970	1980	1990	2000	2	Sekundär	3	5	6	7
3	Tertiär	3	9	10	12						3	Tertiär	3	9	10	12	1	Primär	2	2	1	1	3	Tertiär	3	9	10	12
Summe	insgesamt	9	16	17	20						Summe		9	16	17	20	2	Sekundär	4	5	5	6	Summe		9	16	17	20
GLIEDERUNGSZAHLEN (Anteile in %)											GLIEDERUNGSZAHLEN (Anteile in %)						3	Tertiär	8	10	12	15	GLIEDERUNGSZAHLEN (Anteile in %)
																	Summe		14	17	18	22
i	Sektor	1970	1980	1990	2000						i	Sektor	1970	1980	1990	2000	Variante 3						i	Sektor	1970	1980	1990	2000
1	Primär										1	Primär	33.33	12.5	5.88	5	i	Sektor	1970	1980	1990	2000	1	Primär	33.3333	12.5	5.88235	5
2	Sekundär										2	Sekundär	33.33	31.25	35.29	35	1	Primär	1	1	1	1	2	Sekundär	33.3333	31.25	35.2941	35
3	Tertiär										3	Tertiär	33.33	56.25	58.82	60	2	Sekundär	4	5	5	5	3	Tertiär	33.3333	56.25	58.8235	60
Summe	insgesamt	0	0	0	0						Summe		99.99	100	99.99	100	3	Tertiär	7	8	9	10	Summe		100	100	100	100
																	Summe		12	14	15	16
													33.33	12.5	5.88	5
													33.33	31.25	35.29	35
													33.33	56.25	58.82	60
													99.99	100	99.99	100

## Sheet: Simulation
Gliederungszahlen									Variante 1
Erwerbstätige nach Wirtschaftsbereichen									Variante 2
									Variante 3
ABSOLUTZAHLEN (in Millionen)
i	Sektor	1970	1980	1990	2000					Sektor	1970	1980	1990	2000
1	Primär	99999	99999	99999	99999					Primär	1	2	2	3
2	Sekundär	99999	99999	99999	99999					Sekundär	5	6	7	8
3	Tertiär	99999	99999	99999	99999					Tertiär	4	6	8	10
Summe	insgesamt	299997	299997	299997	299997					Sektor	1970	1980	1990	2000
GLIEDERUNGSZAHLEN (Anteile in %)										Primär	1	1	1	1
										Sekundär	2	2	3	3
i	Sektor	1970	1980	1990	2000					Tertiär	4	4	5	5
1	Primär	33.3333	33.3333	33.3333	33.3333					Sektor	1970	1980	1990	2000
2	Sekundär	33.3333	33.3333	33.3333	33.3333					Primär	4	3	2	1
3	Tertiär	33.3333	33.3333	33.3333	33.3333					Sekundär	3	4	5	6
Summe	insgesamt	100	100	100	100					Tertiär	4	5	6	7
