# Supplementary material
Source: publisher site journal article supplement (https://www.degruyterbrill.com/publication/isbn/9783486710663/downloadAsset/9783486710663_Anwendungen--de.zip)
Supplement: Supplementary file 31 [file A_1202_Beziehungszahlen.xls]

## Sheet: Übung
Beziehungszahlen										Beziehungszahlen						Variante 1
Erwerbspersonen, Einwohner und Erwerbsquoten										Erwerbspersonen, Einwohner und Erwerbsquoten						Erwerbspersonen
ABSOLUTZAHLEN (in Millionen)										ABSOLUTZAHLEN (in Millionen)						1970	2000
																4	5.5
		Erwerbspersonen		Einwohner								Erwerbspersonen		Einwohner		3	4.5
																7	10
i	Geschlecht	1970	2000	1970	2000					i	Geschlecht	1970	2000	1970	2000	Variante 2
1	männlich	4	5.5	7	10					1	männlich	4	5.5	7	10	Erwerbspersonen
2	weiblich	3	4.5	8	10					2	weiblich	3	4.5	8	10
	insgesamt	7	10	15	20						insgesamt	7	10	15	20	1970	2000
BEZIEHUNGSZAHLEN (Erwerbsquoten in %)										BEZIEHUNGSZAHLEN (Erwerbsquoten in %)						3.5	5
																4	5
i	Geschlecht	1970	2000							i	Geschlecht	1970	2000			7.5	10	i	Geschlecht	1970	2000
1	männlich									1	männlich	57.14	55			Variante 3		1	männlich	57.1429	55
2	weiblich									2	weiblich	37.5	45			Erwerbspersonen		2	weiblich	37.5	45
Summe	insgesamt									Summe	insgesamt	46.67	50					Summe	insgesamt	46.6667	50
															Variante 1	1970	2000
															Variante 2	4	5
															Variante 3	4	5
																8	10

## Sheet: Simulation
Beziehungszahlen									Variante 1
Erwerbspersonen, Einwohner und Erwerbsquoten									Variante 2
									Variante 3
ABSOLUTZAHLEN (in Millionen)
										1990	2000
		Erwerbspersonen		Einwohner						5	7
										6	8
i	Geschlecht	1990	2000	1990	2000					1990	2000
1	männlich	5	7	10	12					3	4
2	weiblich	6	8	10	13					3	5
	insgesamt	11	15	20	25					1990	2000
BEZIEHUNGSZAHLEN (Erwerbsquoten in %)										6	7
										4	3
i	Geschlecht	1990	2000
1	männlich	50	58.3333
2	weiblich	60	61.5385
Summe	insgesamt	55	60
