# Supplementary material
Source: publisher site journal article supplement (https://www.degruyterbrill.com/publication/isbn/9783486710663/downloadAsset/9783486710663_Anwendungen--de.zip)
Supplement: Supplementary file 32 [file A_1203_Mezahlen.xls]

## Sheet: Übung
Meßzahlen										2	Meßzahlen						Variante 1
Erwerbstätige nach Wirtschaftsbereichen										5	Erwerbstätige nach Wirtschaftsbereichen						i	Sektor	1970	1980	1990	2000
										7							1	Primär	2	2	1	1
ABSOLUTZAHLEN (in Millionen)										14	ABSOLUTZAHLEN (in Millionen)						2	Sekundär	3	5	5	6
										Variante 1							3	Tertiär	5	7	7	8
i	Sektor	1970	1980	1990	2000					Variante 2	i	Sektor	1970	1980	1990	2000	Summe		10	14	13	15
1	Primär	2	2	1	1					Variante 3	1	Primär	2	2	1	1	Variante 2
2	Sekundär	3	5	5	6						2	Sekundär	3	5	5	6	i	Sektor	1970	1980	1990	2000
3	Tertiär	5	7	7	8						3	Tertiär	5	7	7	8	1	Primär	2	2	2	1
Summe		10	14	13	15						Summe	insgesamt	10	14	13	15	2	Sekundär	4	5	5	5
ZEITLICHE MESSZAHLEN (Wert im Basisjahr = 100%)											ZEITLICHE MESSZAHLEN (Wert im Basisjahr = 100%)						3	Tertiär	6	6	7	7	ZEITLICHE MESSZAHLEN (Wert im Basisjahr = 100%)
																	Summe		12	13	14	13
i	Sektor	1970	1980	1990	2000						i	Sektor	1970	1980	1990	2000	Variante 3						i	Sektor	1970	1980	1990	2000
1	Primär										1	Primär	100	100	50	50	i	Sektor	1970	1980	1990	2000	1	Primär	100	100	50	50
2	Sekundär										2	Sekundär	60	100	100	120	1	Primär	1	1	1	1	2	Sekundär	60	100	100	120
3	Tertiär										3	Tertiär	71.43	100	100	114.29	2	Sekundär	4	4	5	5	3	Tertiär	71.4286	100	100	114.286
Summe											Summe	insgesamt	71.43	100	92.86	107.14	3	Tertiär	6	6	8	9	Summe	insgesamt	71.4286	100	92.8571	107.143
			Basisjahr	1980										Basisjahr	1980		Summe		11	11	14	15

## Sheet: Simulation
Meßzahlen										1	Variante 1
Erwerbstätige nach Wirtschaftsbereichen										4	Variante 2
										8	Variante 3
ABSOLUTZAHLEN (in Millionen)										13
i	Sektor	1970	1980	1990	2000							1970	1980	1990	2000
1	Primär	1	1	2	2							1	1	2	2
2	Sekundär	4	5	6	7							4	5	6	7
3	Tertiär	8	9	9	10							8	9	9	10
Summe		13	15	17	19							1970	1980	1990	2000
ZEITLICHE MESSZAHLEN (Wert im Basisjahr = 100%)												4	4	3	2
												12	14	17	20
i	Sektor	1970	1980	1990	2000							13	15	18	24
1	Primär	100	100	200	200							1970	1980	1990	2000
2	Sekundär	100	125	150	175							1	1	1	1
3	Tertiär	100	112.5	112.5	125							6	7	8	8
Summe		100	115.385	130.769	146.154							8	8	9	9
			Basisjahr	1970
