# Supplementary material
Source: publisher site journal article supplement (https://www.degruyterbrill.com/publication/isbn/9783486710663/downloadAsset/9783486710663_Anwendungen--de.zip)
Supplement: Supplementary file 33 [file A_1204_Verhltniszahlen_Mittelwert.xls]

## Sheet: Simulation
Mittelwerte von Verhältniszahlen								Variante 1
Region	Arbeitslose	Erwerbs- personen	Arbeitslosen-					Variante 2	Arbeitslose	Erwerbs-	Arbeitslose	Erwerbs-	Arbeitslose	Erwerbs-
			quote					Variante 3		personen		personen		personen
			in %
A	1	19	5.26316						1	19	1	25	1	20
B	1	20	5						1	20	1	25	1.5	30
C	1.5	22	6.81818						1.5	22	1	50	2	40
Summe	3.5	61	5.7377
Region	Arbeitslosen-	Erwerbs-	Erwerbs-	AL-Quote mal
	quote	personen	personen-	Erwerbspers.-
	in %	in Millionen	Anteil	Anteil
A	5.26316	19	0.311475	1.63934
B	5	20	0.327869	1.63934
C	6.81818	22	0.360656	2.45902
Summe		61	1	5.7377
