# Supplementary material
Source: publisher site journal article supplement (https://www.degruyterbrill.com/publication/isbn/9783486710663/downloadAsset/9783486710663_Anwendungen--de.zip)
Supplement: Supplementary file 34 [file A_1301_Index_Laspeyres_Paasche.xls]

## Sheet: Übung
Indexzahlen nach Laspeyres und nach Paasche											Indexzahlen nach Laspeyres und nach Paasche							Übung	1	ÜBUNG 1				ÜBUNG 2				ÜBUNG 3
i	pi0	pit	qi0	qit	pi0qi0	pitqi0	pi0qit	pitqit			i	pi0	pit	qi0	qit	pi0qi0	pitqi0	pi0qit	pitqit	pi0	pit	qi0	qit	pi0	pit	qi0	qit	pi0	pit	qi0	qit
1	1	2	2	2							1	1	2	2	2	2	4	2	4	1	2	2	2	2	2	2	2	1	2	2	2
2	2	4	2	2							2	2	4	2	2	4	8	4	8	2	4	2	2	3	3	2	2	2	2	2	3
3	3	6	3	3							3	3	6	3	3	9	18	9	18	3	6	3	3	4	8	6	3	2	3	3	3
4	4	8	2	2							4	4	8	2	2	8	16	8	16	4	8	2	2	5	10	4	2	3	3	4	4
5	5	10	4	4							5	5	10	4	4	20	40	20	40	5	10	4	4	6	12	8	4	3	4	5	4
Summe	-	-	-	-	0	0	0	0			Summe					43	86	43	86
												PL(0t)		x	#VALUE!	QL(0t)		x	#VALUE!	Variante 1
																				Variante 2
																				Variante 3
														x				x
												PP(0t)		x	#VALUE!	QP(0t)		x	#VALUE!
														x				x
											Löschen:
											Lösch D10	1
											Lösch D13	1
											Lösch D17	1
											Lösch D20	1
											Lösch H10	1
											Lösch H13	1
											Lösch H17	1
											Lösch H20	1
											Summe	8

## Sheet: Simulation
Indexzahlen nach Laspeyres und nach Paasche															Variante 1
i	pi0	pit	qi0	qit	pi0qi0	pitqi0	pi0qit	pitqit			Zellen-Leerkontrolle				Variante 2	pi0	pit	qi0	qit
1	10	14	9	8	90	126	80	112			1	1	1	1	Variante 3	10	14	9	8
2	10	15	8	7	80	120	70	105			1	1	1	1		10	15	8	7
3	15	18	10	8	150	180	120	144			1	1	1	1		15	18	10	8
4	20	18	10	15	200	180	300	270			1	1	1	1		20	18	10	15
5	30	28	20	25	600	560	750	700			1	1	1	1		30	28	20	25
Summe	-	-	-	-	1120	1166	1320	1331			5	5	5	5		pi0	pit	qi0	qit
																10	11	3	4
		1166	1.04107			1320	1.17857									10	11	3	4
																20	22	3	4
																20	22	3	4
		1120				1120										30	33	3	4
																pi0	pit	qi0	qit
																1	2	3	4
																2	3	3	4
		1331	1.00833			1331	1.14151									3	4	3	5
																4	5	4	5
																5	6	4	2
		1320				1166
