# Supplementary material
Source: publisher site journal article supplement (https://www.degruyterbrill.com/publication/isbn/9783486710663/downloadAsset/9783486710663_Anwendungen--de.zip)
Supplement: Supplementary file 35 [file A_1302_Indexdiff_Lasp_Paasche_Wert.xls]

## Sheet: Simulation
Index-Differenzen (Laspeyres, Paasche, Wert)															Variante 1	Var. 1				Var. 2				Var. 3
i	pi0	pit	qi0	qit	pi0qi0	pitqi0	pi0qit	pitqit			Zellen-Leerkontrolle				Variante 2	pi0	pit	qi0	qit	pi0	pit	qi0	qit	pi0	pit	qi0	qit
1	10	15	6	5	60	90	50	75			1	1	1	1	Variante 3	10	15	6	5	4	5	2	1	1	2	3	4
2	20	25	8	7	160	200	140	175			1	1	1	1		20	25	8	7	4	6	2	1	5	6	7	8
3	30	25	10	13	300	250	390	325			1	1	1	1		30	25	10	13	5	7	2	1	9	10	11	12
Summe	-	-	-	-	520	540	580	575			3	3	3	3
	PL01 =	540	. 100	103.846
		520				Diff:PL-PP	4.70822
	PP01 =	575	. 100	99.1379
		580
	QL01 =	580	. 100	111.538
		520				Diff:QL-QP	5.05698
	QP01 =	575	. 100	106.481
		540
	U01 =	575	. 100	110.577	Hinweis: Indexwerte in % und
		520			Differenzen in %-Punkten !
