# Supplementary material
Source: publisher site journal article supplement (https://www.degruyterbrill.com/publication/isbn/9783486710663/downloadAsset/9783486710663_Anwendungen--de.zip)
Supplement: Supplementary file 36 [file A_1303_Preisindex_Laspeyres_Mittelwert.xls]

## Sheet: Simulation1
Preisindex nach Laspeyres als Mittelwert von Meßzahlen												Variante 1
i	pi0	pit	qi0	qit	Ausgaben			Preis-				Variante 2
					in Basis-	Ausgaben-	Preis-	Meßzahl *				Variante 3
					periode	Anteile	Meßzahl	Ausgaben-
					pi0qi0	gi (%)	pit/pi0	Anteil					pi0	pit	qi0	qit
1	1	2	4	4	4	5	2	10					1	2	4	4
2	2	3	6	5	12	15	1.5	22.5					2	3	6	5
3	3	4	5	5	15	18.75	1.33333	25					3	4	5	5
4	4	5	6	5	24	30	1.25	37.5					4	5	6	5
5	5	6	5	6	25	31.25	1.2	37.5					5	6	5	6
Summe	-	-	-	-	80	100	-	132.5					pi0	pit	qi0	qit
													1	2	5	4
				=	132.5	%							2	2	5	5
													3	2	5	5
													4	2	5	5
													5	2	5	6
													pi0	pit	qi0	qit
													1	2	4	4
													2	3	5	5
													3	4	4	5
													4	5	5	5
													5	6	4	6

## Sheet: Simulation2
Preisindex als Mittelwert von Meßzahlen											Variante 1
											Variante 2
		i	Preismeßzahl	Ausgaben	Ausgaben-	Meßzahl *					Variante 3
			pit/pi0		anteile in %	Ausg.-Anteil						1.1	5
		1	0.9	5	10	9						1.1	10
		2	0.9	5	10	9						2	5
		3	1.2	5	10	12
		4	1.2	5	10	12
		5	1.05	5	10	10.5
		6	1.03	5	10	10.3
		7	1.02	5	10	10.2
		8	1.01	5	10	10.1
		9	1.02	5	10	10.2
		10	1.1	5	10	11
		Summe	-	50	100	104.3
				PL01 =	104.3
