# Supplementary material
Source: publisher site journal article supplement (https://www.degruyterbrill.com/publication/isbn/9783486710663/downloadAsset/9783486710663_Anwendungen--de.zip)
Supplement: Supplementary file 37 [file A_1304_Preisindex_Lebenshaltung.xls]

## Sheet: Simulation
Preisindex der Lebenshaltung										Variante 1
										Variante 2
	i	Hauptgruppen	Gewicht	Subindex	Subi.*Gew.					Variante 3
	1	Nahrungsmittel, Getränke	131.26	100	13.126						90	80	80
	2	Alkohol. Getränke, Tabakw.	41.67	100	4.167						110	120	100
	3	Bekleidung und Schuhe	68.76	100	6.876
	4	Wohnung, Wasser, Energie	274.77	100	27.477
	5	Hausrat incl. Instandhaltung	70.56	100	7.056
	6	Gesundheitspflege	34.39	100	3.439
	7	Verkehr	138.82	100	13.882
	8	Nachrichtenübermittlung	22.66	90	2.0394
	9	Freizeit und Kultur	103.57	110	11.3927
	10	Bildungswesen	6.51	100	0.651
	11	Hotels und Gaststätten	46.08	100	4.608
	12	Versch. Waren und Dienstl.	60.95	100	6.095
	Summe		1000	-	100.809
		PL01 =	100.809
