# Supplementary material
Source: publisher site journal article supplement (https://www.degruyterbrill.com/publication/isbn/9783486710663/downloadAsset/9783486710663_Anwendungen--de.zip)
Supplement: Supplementary file 38 [file A_1305_Preisindex_Fisher_Lowe.xls]

## Sheet: Simulation
Indexzahlen nach Fisher und nach Lowe														Variante 1
i	pi0	pit	qi0	qit	pi0qi0	pitqi0	pi0qit	pitqit	qi	pi0qi	pitqi			Variante 2	pi0	pit	qi0	qit
1	1	2	5	5	5	10	5	10	5	5	10			Variante 3	1	2	5	5
2	2	3	5	4	10	15	8	12	4.5	9	13.5				2	3	5	4
3	4	3	5	6	20	15	24	18	5.5	22	16.5				4	3	5	6
Summe	-	-	-	-	35	40	37	40	15	36	40				pi0	pit	qi0	qit
															1	2	5	7
	PF01 =	114.286	108.108	111.154											2	3	5	8
						Diff.:PF- PLo		0.0428918							4	3	13	14
															pi0	pit	qi0	qit
	PLo01 =	40	. 100	111.111											1	2	8	6
		36													2	3	8	6
															4	3	8	6
	PL01 =	40	. 100	114.286
		35				Diff.:PL- PP		6.17761
	PP01 =	40	. 100	108.108
		37
