# Supplementary material
Source: publisher site journal article supplement (https://www.degruyterbrill.com/publication/isbn/9783486710663/downloadAsset/9783486710663_Anwendungen--de.zip)
Supplement: Supplementary file 39 [file A_1306_Preisbereinigung.xls]

## Sheet: Simulation
Preisbereinigung											Variante 1	Variante 1				Variante 2				Variante 3
i	pi0	pit	qi0	qit	pi0qi0	pitqi0	pi0qit	pitqit			Variante 2	pi0	pit	qi0	qit	pi0	pit	qi0	qit	pi0	pit	qi0	qit
1	10	11	4	5	40	44	50	55			Variante 3	10	11	4	5	10	11	4	5	10	11	4	4
2	20	22	4	4	80	88	80	88				20	22	4	4	20	22	4	4	20	22	4	3
3	20	21	3	4	60	63	80	84				20	21	3	4	20	21	3	4	20	21	3	4
4	30	33	6	7	180	198	210	231				30	33	6	7	30	33	6	5	30	33	6	5
5	40	42	6	6	240	252	240	252				40	42	6	6	40	42	6	6	40	42	6	6
Summe	-	-	-	-	600	645	660	710
	U01 =	710	. 100	118.333
		600
	PL01 =	645	. 100	107.5
		600
	QP01 =	118.333	. 100	710	. 100	110.078
		107.5		645
	PP01 =	710	. 100	107.576
		660
	QL01 =	118.333	. 100	660	. 100	110
		107.576		600
