# Supplementary material
Source: publisher site journal article supplement (https://www.degruyterbrill.com/publication/isbn/9783486710663/downloadAsset/9783486710663_Anwendungen--de.zip)
Supplement: Supplementary file 40 [file A_1307_Umbasierung.xls]

## Sheet: Simulation
Umbasierung								140						100	Variante 1	100	110	120	130	140	1996
	Jahr			1996	1997	1998	1999	2000							Variante 2	100	90	110	105	200	1998
	Index in %														Variante 3	100	110	140	120	130	2000
	1996	=> 100		100	110	120	130	140
Basisjahr	1996	=> 100		100	110	120	130	140
	Veränderung in %-Punkten
	1996	=> 100		-	10	10	10	10
	1996	=> 100		-	10	10	10	10
	Veränderungsrate in %
	1996	=> 100		-	10	9.09091	8.33333	7.69231
	1996	=> 100		-	10	9.09091	8.33333	7.69231
