# Supplementary material
Source: publisher site journal article supplement (https://www.degruyterbrill.com/publication/isbn/9783486710663/downloadAsset/9783486710663_Anwendungen--de.zip)
Supplement: Supplementary file 41 [file A_1401_Zweidimensionale_Verteilung.xls]

## Sheet: Übung
Zweidimensionale Verteilung (absolut)														Variante 1	Zweidimensionale Verteilung										Übung 1				URLISTE Variante 1	i	1	2	3	4	5	6	7	8	9
	Variable Y	-1		0		1		insgesamt						Variante 2		Mng Y	-1		0		1		insgesamt		4	1	1	6		X	-1	-1	-1	-1	-1	-1	0	0	0
Variable X														Variante 3	Mng X										1	4	1	6		Y	-1	-1	-1	-1	0	1	-1	0	0
-1															-1		4		1		1		6		1	1	4	6		i	10	11	12	13	14	15	16	17	18
																									6	6	6	18		X	0	0	0	1	1	1	1	1	1
0															0		1		4		1		6		Übung 2					Y	0	0	1	-1	0	1	1	1	1
																									1	1	1	3	URLISTE Variante 2	i	1	2	3	4	5	6	7	8	9
1															1		1		1		4		6		2	2	2	6		X	-1	-1	-1	0	0	0	0	0	0
																									3	3	3	9		Y	-1	0	1	-1	-1	0	0	1	1
insgesamt															insgesamt		6		6		6		18		6	6	6	18		i	10	11	12	13	14	15	16	17	18
																									Übung 3					X	1	1	1	1	1	1	1	1	1
																														Y	-1	-1	-1	0	0	0	1	1	1
URLISTE	i	1	2	3	4	5	6	7	8	9					i	1	2	3	4	5	6	7	8	9	2	2	2	6	URLISTE Variante 3	i	1	2	3	4	5	6	7	8	9
	X	-1	-1	-1	-1	-1	-1	0	0	0					X	-1	-1	-1	-1	-1	-1	0	0	0	2	2	2	6		X	-1	-1	-1	-1	-1	-1	0	0	0
	Y	-1	-1	-1	-1	0	1	-1	0	0					Y	-1	-1	-1	-1	0	1	-1	0	0	2	2	2	6		Y	-1	-1	0	0	1	1	-1	-1	0
	i	10	11	12	13	14	15	16	17	18					i	10	11	12	13	14	15	16	17	18	6	6	6	18		i	10	11	12	13	14	15	16	17	18
	X	0	0	0	1	1	1	1	1	1					X	0	0	0	1	1	1	1	1	1						X	0	0	0	1	1	1	1	1	1
	Y	0	0	1	-1	0	1	1	1	1					Y	0	0	1	-1	0	1	1	1	1						Y	0	1	1	-1	-1	0	0	1	1

## Sheet: Simulation
Zweidimensionale Verteilung (absolut und relativ)														Variante 1
	Variable Y	Häufig-		-1		0		1		insgesamt				Variante 2
Variable X		keiten												Variante 3
-1		fjk		1		2		3		6					1	2	3
			h'jk		3.0303		6.06061		9.09091		18.1818				2	3	4
0		fjk		2		3		4		9					5	6	7
			h'jk		6.06061		9.09091		12.1212		27.2727				0	0	4
1		fjk		5		6		7		18					0	7	0
			h'jk		15.1515		18.1818		21.2121		54.5455				9	0	0
insgesamt				8		11		14		33					3	3	3
					24.2424		33.3333		42.4242		100				3	3	3
															3	3	3
