# Supplementary material
Source: publisher site journal article supplement (https://www.degruyterbrill.com/publication/isbn/9783486710663/downloadAsset/9783486710663_Anwendungen--de.zip)
Supplement: Supplementary file 42 [file A_1402_Zweidimensionale_Verteilung_3D.xls]

## Sheet: Simulation1
Zweidimensionale Verteilung: 3D-Grafik (absolut)																								Variante 1					Übung 1
																								Variante 2					5	1	1	7
Absolute																								Variante 3					1	4	1	6
Häufigkeitsverteilung																													1	1	5	7
																													7	6	7	20
	Y	-1		0		1																							Übung 2
X																													1	1	1	3
-1		5		1		1																							2	2	3	7
																													3	4	5	12
0		1		4		1																							6	7	9	22
																													Übung 3
1		1		1		5
																										-1			4	3	4	11
																													5	3	3	11
																										0			4	4	4	12
																													13	10	11	34
																										1

## Sheet: Simulation2
Zweidimensionale Verteilung: 3D-Grafik (relativ)																								Variante 1					Übung 1
Absolute Häufigkeitsverteilung																								Variante 2					7	1	1	9
																								Variante 3					1	9	2	12
	Y	-1		0		1																							1	2	8	11
X																													9	12	11	32
-1		7		1		1																							Übung 2
																													1	1	1	3
0		1		9		2																							2	2	2	6
																													8	6	7	21
1		1		2		8																							11	9	10	30
																													Übung 3
Relative Häufigkeitsverteilung																										-1			6	7	6	19
																													5	6	7	18
	Y	-1		0		1																				0			6	7	7	20
X																													17	20	20	57
-1		0.21875		0.03125		0.03125																				1
0		0.03125		0.28125		0.0625
1		0.03125		0.0625		0.25
