# Supplementary material
Source: publisher site journal article supplement (https://www.degruyterbrill.com/publication/isbn/9783486710663/downloadAsset/9783486710663_Anwendungen--de.zip)
Supplement: Supplementary file 43 [file A_1403_Bedingte_Verteilungen.xls]

## Sheet: Simulation1
Bedingte Verteilungen X (unter Bedingung Y)															Variante 1					Übung 1
	Variable Y	Häufig-		-1		0		1		insgesamt					Variante 2					4	1	1	6
Variable X		keiten													Variante 3					1	4	1	6
-1		fjk		4		1		1		6										1	1	4	6
			h'j | k		66.6667		16.6667		16.6667		33.3333									6	6	6	18
0		fjk		1		4		1		6										Übung 2
			h'j | k		16.6667		66.6667		16.6667		33.3333									1	1	1	3
1		fjk		1		1		4		6										2	2	2	6
			h'j | k		16.6667		16.6667		66.6667		33.3333									3	3	3	9
insgesamt				6		6		6		18										6	6	6	18
					100		100		100		100									Übung 3
																				2	2	2	6
																				2	2	2	6
																				2	2	2	6
																				6	6	6	18

## Sheet: Simulation2
Bedingte Verteilungen Y (unter Bedingung X)															Variante 1					Übung 1
	Variable Y	Häufig-		-1		0		1		insgesamt					Variante 2					1	2	7	10
Variable X		keiten													Variante 3					1	8	1	10
-1		fjk		1		2		7		10										11	2	2	15
			h'k | j		10		20		70		100									13	12	10	35
0		fjk		1		8		1		10										Übung 2
			h'k | j		10		80		10		100									2	4	8	14
1		fjk		11		2		2		15										1	3	9	13
			h'k | j		73.3333		13.3333		13.3333		100									1	5	7	13
insgesamt				13		12		10		35										4	12	24	40
					37.1429		34.2857		28.5714		100									Übung 3
																				6	7	6	19
																				6	7	7	20
																				6	6	7	19
																				18	20	20	58
