# Supplementary material
Source: publisher site journal article supplement (https://www.degruyterbrill.com/publication/isbn/9783486710663/downloadAsset/9783486710663_Anwendungen--de.zip)
Supplement: Supplementary file 44 [file A_1404_Zweidim_Sulendiagramm.xls]

## Sheet: Simulation
Säulendiagramm für zwei Verteilungen												Variante 1
												Variante 2
xj bzw. yj	fx	fy										Variante 3	fx	fy
-1	22	47											22	47
0	32	32											32	32
1	47	22											47	22
Summe	101	101											fx	fy
													85	67
													85	67
													85	67
													fx	fy
													18	54
													64	92
													21	48
