# Supplementary material
Source: publisher site journal article supplement (https://www.degruyterbrill.com/publication/isbn/9783486710663/downloadAsset/9783486710663_Anwendungen--de.zip)
Supplement: Supplementary file 45 [file A_1405_Streuungsdiagramm.xls]

## Sheet: Simulation
Streuungsdiagramm												Variante 1	Variante 1			Variante 2			Variante 3
	Variablen											Variante 2		Ausgaben für			Ausgaben für			Ausgaben für
i	X	Y										Variante 3		Bücher	Musik-CDs		Bücher	Musik-CDs		Bücher	Musik-CDs
													i	X	Y	i	X	Y	i	X	Y
1	60	30											1	60	30	1	60	140	1	60	160
2	60	50											2	60	50	2	60	100	2	60	140
3	80	60											3	80	60	3	80	60	3	80	140
4	80	70											4	80	70	4	80	80	4	80	100
5	90	40											5	90	40	5	90	40	5	90	80
6	100	80											6	100	80	6	100	80	6	100	40
7	120	100											7	120	100	7	120	100	7	120	70
8	120	140											8	120	140	8	120	140	8	120	70
9	140	140											9	140	140	9	140	140	9	140	50
10	150	160											10	150	160	10	150	80	10	150	40
