# Supplementary material
Source: publisher site journal article supplement (https://www.degruyterbrill.com/publication/isbn/9783486710663/downloadAsset/9783486710663_Anwendungen--de.zip)
Supplement: Supplementary file 46 [file A_1501_Kovarianz.xls]

## Sheet: Übung
Kovarianz														Kovarianz										Übung	1	Variante 1		Variante 2		Variante 3
i	xi	yi												i	xi	yi										xi	yi	xi	yi	xi	yi
1	1	1												1	1	1	-2	-2	4				x(quer)	y(quer)		1	1	1	1	5	1
2	1	5													1	5	-2	2	-4				3	3		1	5	1	2	4	2
3	3	3													3	3	0	0	0				3	3		3	3	1	3	3	3
4	5	1													5	1	2	-2	-4				3	3		5	1	1	4	2	4
5	5	5													5	5	2	2	4				3	3		5	5	1	5	1	5
Summe	15	15	0	0	0										15	15			0				3	3
Arithm. Mittel																										Variante 1
	3	3													3	3										Variante 2
																										Variante 3
Kovarianz
																		0		0
																		5
														Lösch E15	1
														Lösch E16	1
														Lösch G15
														Summe	2

## Sheet: Simulation1
Kovarianz																			Variante 1
i	xi	yi											x	y	x(quer)	y(quer)	Wertepaare-Check		Variante 2	xi	yi	xi	yi	xi	yi
1	1	5	-2.2	1.2	-2.64								0	0	3.2	3.8			Variante 3	1	5	1	5	5	1
2	2	4	-1.2	0.2	-0.24								1	1	3.2	3.8				2	4	2	5	4	2
3	3	4	-0.2	0.2	-0.04								2	2	3.2	3.8				3	4	3	5	4	3
4	5	4	1.8	0.2	0.36								3	3	3.2	3.8				5	4	4	5	2	5
5	5	2	1.8	-1.8	-3.24								4	4	3.2	3.8				5	2	5	5	1	5
Summe	16	19	0	0	-5.8								5	5	3.2	3.8	0
													6	6	3.2	3.8
Arithm. Mittel
	3.2	3.8													5	5
Kovarianz
				-5.8		-1.16
				5

## Sheet: Simulation2
Kovarianz															Anzahl x	Anzahl y	x	y	x(quer)	y(quer)	Wertepaare-Check		Variante 1
i	xi	yi													4	4	0	0	2.5	2.5			Variante 2	xi	yi	xi	yi	xi	yi	xi	yi
1	1	1	-1.5	-1.5	2.25								y-Abweichungen		x-Abweichungen		1	1	2.5	2.5			Variante 3	1	1	5	1	1	1	1	3
2	2	2	-0.5	-0.5	0.25								1	1	1	1	2	2	2.5	2.5			Variante 4	2	2	4	2	1	5	2	3
3	3	3	0.5	0.5	0.25								1	2.5	2.5	1	3	3	2.5	2.5				3	3	3	3	5	1	3	3
4	4	4	1.5	1.5	2.25												4	4	2.5	2.5				4	4	2	5	5	5	4	3
Summe	10	10	0	0	5								2	2	2	2	5	5	2.5	2.5	0
													2	2.5	2.5	2	1	1	2.5	2.5
Arithm. Mittel																	4	4
	2.5	2.5											3	3	3	3
													3	2.5	2.5	3
Kovarianz
													4	4	4	4
				5		1.25							4	2.5	2.5	4
				4
