# Supplementary material
Source: publisher site journal article supplement (https://www.degruyterbrill.com/publication/isbn/9783486710663/downloadAsset/9783486710663_Anwendungen--de.zip)
Supplement: Supplementary file 47 [file A_1502_Methode_der_kleinsten_Quadrate.xls]

## Sheet: Simulation
Methode der kleinsten Quadrate													Variante 1
i	xi	yi											Variante 2	y.	y.	y.	y.
1	1	1	0.7	0.3	0.09	2.5	-1.5	2.25					Variante 3	2.5	2.5	0	1
2	2	1	1.9	-0.9	0.81	2.5	-1.5	2.25						2.5	2.5	1.66667	2
3	3	4	3.1	0.9	0.81	2.5	1.5	2.25						2.5	2.5	3.33333	3
4	4	4	4.3	-0.3	0.09	2.5	1.5	2.25						2.5	2.5	5	4
Summe	10	10	-	6.66134e-16	1.8	-	0	9
														0.894427
													r2	80
													A	-0.5
													B	1.2
													Varianz X	1.25
													Stabw. X	1.11803
													Varianz Y	2.25
													Stabw. Y	1.5
													Kovarianz	1.5
