# Supplementary material
Source: publisher site journal article supplement (https://www.degruyterbrill.com/publication/isbn/9783486710663/downloadAsset/9783486710663_Anwendungen--de.zip)
Supplement: Supplementary file 48 [file A_1503_Korrelationsanalyse.xls]

## Sheet: Simulation
Korrelationskoeffizient nach Bravais-Pearson																					Variante 1	Variante 1		Variante 2		Variante 3
i	xi	yi											Wertepaare-Check				Achsenab.	0.525862	Anzahl(x)	Anzahl(y)	Variante 2	xi	yi	xi	yi	xi	yi
1	2	2	6.76	14.44	9.88								1	1	2	0	Steigung	1.14655	5	5	Variante 3	2	2	2	5	2	2
2	3	4	2.56	3.24	2.88								1	1	2	0	x(i)	y(dach)			Variante 4	3	4	3	6	3	6
3	4	6	0.36	0.04	-0.12								1	1	2	0	0.5				Variante 5	4	6	4	5	4	7
4	6	8	1.96	4.84	3.08								1	1	2	0	1.5				Variante 6	6	8	6	7	6	4
5	8	9	11.56	10.24	10.88								1	1	2	0	2.5					8	9	8	6	8	3
Summe	23	29	23.2	32.8	26.6								5			0	3.5					Variante 4		Variante 5		Variante 6
																	4.5					xi	yi	xi	yi	xi	yi
Arithm.																	5.5					2	2	2	8	9	1
Mittel	4.6	5.8																				8	2	3	7	7	3
	Korrelationskoeffizient n. Bravais-Pearson																					5	5	5	6	5	5
																						2	8	6	4	3	7
					26.6																	8	8	9	3	1	9
							=	0.964275
					23.2	32.8
