# Supplementary material
Source: publisher site journal article supplement (https://www.degruyterbrill.com/publication/isbn/9783486710663/downloadAsset/9783486710663_Anwendungen--de.zip)
Supplement: Supplementary file 49 [file A_1504_Regressionsanalyse.xls]

## Sheet: Simulation1
Regressionsanalyse														Variante 1	Variante 1		Variante 2		Variante 3		Variante 4		Variante 5
i	xi	yi												Variante 2	xi	yi	xi	yi	xi	yi	xi	yi	xi	yi
1	2	2	6.76	10.24	8.32									Variante 3	2	2	2	2	1	1	1	9	1	5
2	3	5	2.56	0.04	0.32									Variante 4	3	5	3	5	3	3	3	6	3	5
3	4	6	0.36	0.64	-0.48									Variante 5	4	6	6	6	5	5	5	6	5	5
4	6	7	1.96	3.24	2.52										6	7	6	8	7	7	7	4	7	5
5	8	6	11.56	0.64	2.72										8	6	9	9	9	9	9	3	9	5
Su.	23	26	23.2	14.8	13.4										Wertepaare-Check		Regressionsgerade
A.Mittel	4.6	5.2		Kovarianz	2.68										0		0	9	x
															0		2.5431	7.74138
Steigungskoeffizienz															0
		=	2.68	=	0.577586										0
			4.64				Regressions- gerade		2.5431	+	0.577586				0
Achsenabschnitt															0
		=	5.2	2.6569	=	2.5431	Korrelations- koeffizient	0.723153	Bestimmt- heitsmaß;%		52.295

## Sheet: Simulation2
Regressionsanalyse														Variante 1	Variante 1		Variante 2		Variante 3		Variante 4		Variante 5
i	xi	yi												Variante 2	xi	yi	xi	yi	xi	yi	xi	yi	xi	yi
1	2	3	3.0625	4	3.5		Regressions- gerade		0.609756	-	1.17073			Variante 3	2	3	1	1	1	12	1	9	1	5
2	3	4	0.5625	1	0.75									Variante 4	3	4	2	2	2	11	3	6	3	5
3	4	5	0.0625	0	0		Steigungskoeffizienz							Variante 5	4	5	3	3	3	10	5	6	5	5
4	4	6	0.0625	1	0.25			=	1	=	1.17073				4	6	4	4	4	9	7	4	7	5
5	5	7	1.5625	4	2.5				0.854167						5	7	5	5	5	8	9	3	9	5
6	4	5	0.0625	0	0		Achsenabschnitt								4	5	6	6	6	7
7	3	3	0.5625	4	1.5			5	4.39024	=	0.609756				3	3	7	7	7	6
8	5	6	1.5625	1	1.25										5	6	8	8	8	5
9	3	5	0.5625	0	0										3	5	9	9	9	4
10	5	6	1.5625	1	1.25		Korrelations- koeffizient	0.883452	Bestimmt- heitsmaß;%		78.0488				5	6	10	10	10	3
11	4	6	0.0625	1	0.25										4	6	11	11	11	2
12	3	4	0.5625	1	0.75										3	4	12	12	12	1
Su.	45	60	10.25	18	12
A.Mittel	3.75	5		Kovarianz	1
