# Supplementary material
Source: publisher site journal article supplement (https://www.degruyterbrill.com/publication/isbn/9783486710663/downloadAsset/9783486710663_Anwendungen--de.zip)
Supplement: Supplementary file 50 [file A_1601_Rangkorrelation.xls]

## Sheet: Übung
Rangkorrelation nach Spearman										WERTE		WERTE						RÄNGE		RÄNGE
i	xi	yi	R(xi)		R(yi)	di	di2			xi	yi	xi	yi	xi	yi	xi	yi	xi	yi	xi	yi	xi	yi	xi	yi
1	11	11								11	11	11	11	1	8	1	9	10	10	10	10	10	1.5	9.5	1.5
2	12	12								12	12	12	12	2	8	1	9	9	9	9	9	9	1.5	9.5	1.5
3	13	14								13	14	13	14	3	7	3	7	8	7	8	7	8	3	7.5	3.5
4	14	15								14	15	14	15	4	6	3	7	7	6	7	6	7	4.5	7.5	3.5
5	15	13								15	13	15	13	5	6	5	5	6	8	6	8	6	4.5	5.5	5.5
6	16	17								16	17	16	17	6	5	5	5	5	4	5	4	5	6	5.5	5.5
7	17	18								17	18	17	18	7	4	7	3	4	3	4	3	4	7	3.5	7.5
8	18	19								18	19	18	19	8	3	7	3	3	2	3	2	3	8	3.5	7.5
9	19	20								19	20	19	20	9	2	9	1	2	1	2	1	2	9	1.5	9.5
10	20	16								20	16	20	16	10	1	9	1	1	5	1	5	1	10	1.5	9.5
Summe	-	-	0		0	-						xi	yi				Variante 1
												0	0	0			Variante 2
Rangkorrelationskoeffizient nach Spearman							Korr.-Koeff.					0	0	0			Variante 3
							rxy =					0	0	0
		1 -	6 .				0.842424					0	0	0
												0	0	0
												0	0	0
												0	0	0
												0	0	0
												0	0	0
												0	0	0
														0

## Sheet: Simulation1
Rangkorrelation nach Spearman											Variante 1
i	xi	yi	R(xi)		R(yi)	di	di2				Variante 2	xi	yi	xi	yi	xi	yi		R(xi)	Zählfeld	1	2	3	4	5	6	7	8	9	10	SP-Ränge
1	21	22	10		9	1	1				Variante 3	21	22	35	25	1	9		10	1	10										10
2	22	21	9		10	-1	1					22	21	35	25	1	9		9	1	9										9
3	23	24	8		7	1	1					23	24	35	16	1	9		8	1	8										8
4	24	25	7		6	1	1					24	25	33	16	3	7		7	1	7										7
5	25	23	6		8	-2	4					25	23	32	16	5	5		6	1	6										6
6	26	27	5		4	1	1					26	27	27	19	5	5		5	1	5										5
7	28	28	3		3	0	0					28	28	15	18	7	3		3	1	3										3
8	27	29	4		2	2	4					27	29	14	16	7	1		4	1	4										4
9	29	30	2		1	1	1					29	30	13	20	7	1		2	1	2										2
10	30	26	1		5	-4	16					30	26	10	21	9	1		1	1	1										1
Summe	-	-	55		55	-	30					xi	yi						55
												1	1	0					R(yi)	Zählfeld	1	2	3	4	5	6	7	8	9	10	SP-Ränge
Rangkorrelationskoeffizient nach Spearman							Korr.-Koeff.					1	1	0					9	1	9										9
							rxy =					1	1	0					10	1	10										10
		1 -	6 .	30	0.818182		0.818182					1	1	0					7	1	7										7
			10	99								1	1	0					6	1	6										6
												1	1	0					8	1	8										8
												1	1	0					4	1	4										4
												1	1	0					3	1	3										3
												1	1	0					2	1	2										2
												1	1	0					1	1	1										1
														0					5	1	5										5
																			55

## Sheet: Simulation2
Bravais-Pearson-Korrelation für Ränge											Variante 1
i	xi	yi	R(xi)		R(yi)		Korrelations-				Variante 2	xi	yi	xi	yi	xi	yi
1	82	81	9		10		Koeffizient				Variante 3	82	81	11	18	1	1
2	81	82	10		9		rxy =					81	82	11	18	1	7
3	83	84	8		7		0.830303					83	84	11	17	1	9
4	84	85	7		6							84	85	13	16	1	1
5	85	83	6		8							85	83	15	15	1	3
6	86	87	5		4		Korrelations-					86	87	19	15	5	5
7	87	88	4		3		Koeffizient					87	88	22	15	5	7
8	88	89	3		2		rRxRy =					88	89	24	15	7	3
9	89	90	2		1		0.830303					89	90	24	12	9	9
10	90	86	1		5							90	86	25	11	9	1
Summe	-	-	55		55							xi	yi
												1	1	0
												1	1	0
												1	1	0
												1	1	0
												1	1	0
												1	1	0
												1	1	0
												1	1	0
												1	1	0
												1	1	0
														0

## Sheet: Tabelle
Rangkorrelation nach Spearman								Grand-Prix
i	xi	yi	R(xi)		R(yi)	di	di2	10 Länder
1			#N/A		#N/A	#N/A	#N/A	Punkte/Ränge
2			#N/A		#N/A	#N/A	#N/A	Wette etc.
3			#N/A		#N/A	#N/A	#N/A
4			#N/A		#N/A	#N/A	#N/A
5			#N/A		#N/A	#N/A	#N/A
6			#N/A		#N/A	#N/A	#N/A
7			#N/A		#N/A	#N/A	#N/A
8			#N/A		#N/A	#N/A	#N/A
9			#N/A		#N/A	#N/A	#N/A
10			#N/A		#N/A	#N/A	#N/A
Summe			0		#N/A		#N/A
Rangkorrelation:							Korr.-Koeff.
							rxy =
		1 -	6 .	#N/A	#N/A		#DIV/0!
			0	-1
