# Supplementary material
Source: publisher site journal article supplement (https://www.degruyterbrill.com/publication/isbn/9783486710663/downloadAsset/9783486710663_Anwendungen--de.zip)
Supplement: Supplementary file 51 [file A_1602_Erwartete_Hufigkeiten.xls]

## Sheet: Simulation
Erwartete Häufigkeiten (Zusammenhangsanalyse)														Variante 1	28	4	7	74
	Variable Y	Häufig-		-		+		insgesamt						Variante 2	4	5	5	4
Variable X		keiten												Variante 3	4	4	4	4
-		fjk		28		4		32
			ejk		9.9115		22.0885
+		fjk		7		74		81
			ejk		25.0885		55.9115
insgesamt				35		78		113
