# Supplementary material
Source: publisher site journal article supplement (https://www.degruyterbrill.com/publication/isbn/9783486710663/downloadAsset/9783486710663_Anwendungen--de.zip)
Supplement: Supplementary file 52 [file A_1603_Chi-Quadrat+MQK+Pearson.xls]

## Sheet: Simulation1
Chi-Quadrat + Mittlere Quadr. Kontingenz + Pearson-Koeffizient: 4 Felder															Variante 1	28	4	7	74
	Y	Häufig-		-		fjk-ejk	+		fjk-ejk	insgesamt					Variante 2	37	42	21	20
X		keiten				(fjk-ejk)2/ejk			(fjk-ejk)2/ejk						Variante 3	20	20	40	40
-		fjk		28		18.0885	4		-18.0885	32
			ejk		9.9115	33.0115		22.0885	14.8129
+		fjk		7		-18.0885	74		18.0885	81
			ejk		25.0885	13.0416		55.9115	5.85199
insgesamt				35			78			113
							MQK				0.590424
Chi-Quadrat						66.7179	Pearson-Koeff.				0.609292

## Sheet: Simulation2
Chi-Quadrat + Mittlere Quadr. Kontingenz + Pearson-Koeffizient: 9 Felder																	Variante 1	15	1	2	2	20	3	4	5	31
	Y	Häufig-		-		fjk-ejk	=		fjk-ejk	+		fjk-ejk	insgesamt				Variante 2	5	5	5	5	5	5	5	5	5
X		keiten				(fjk-ejk)2/ejk			(fjk-ejk)2/ejk			(fjk-ejk)2/ejk					Variante 3	14	10	6	25	30	15
-		fjk		15		10.4458	1		-4.63855	2		-5.80723	18
			ejk		4.55422	23.959		5.63855	3.8159		7.80723	4.31957
=		fjk		2		-4.3253	20		12.1687	3		-7.84337	25
			ejk		6.3253	2.95768		7.83133	18.9082		10.8434	5.67337
+		fjk		4		-6.12048	5		-7.53012	31		13.6506	40
			ejk		10.1205	3.70143		12.5301	4.52531		17.3494	10.7404
insgesamt				21			26			36			83
Chi- Quadrat						49.6408	MQK			0.598082			0.61176
