# Supplementary material
Source: publisher site journal article supplement (https://www.degruyterbrill.com/publication/isbn/9783486710663/downloadAsset/9783486710663_Anwendungen--de.zip)
Supplement: Supplementary file 53 [file A_1701_Trend_Regression.xls]

## Sheet: Simulation
Zeitreihenanalyse - Trendgerade (Regressionsanalyse)																	Variante 1
t	yt		A: Eine Regr.gerade										t	y(ganz)	y1	y2	Variante 2
1	10		a=	50.8333									1	49.4872	15.7143		Variante 3	10	10	10
2	30		b=	-1.34615									2	48.141	29.4286			30	25	15
3	50		B=	4.73485									3	46.7949	43.1429			50	30	20
4	60		B: Zwei Regr.geraden										4	45.4487	56.8571			60	20	18
5	70		1. Teil ( t = 1 bis 6)										5	44.1026	70.5714			70	10	25
6	80		a1=	2									6	42.7564	84.2857			80	20	30
7	60		b1=	13.7143									7	41.4103		55.2381		60	40	35
8	40		B1=	96.8067									8	40.0641		46.8095		40	50	31
9	40		2. Teil ( t = 7 bis 12)										9	38.7179		38.381		40	60	40
10	30		a2=	114.238									10	37.3718		29.9524		30	50	50
11	20		b2=	-8.42857									11	36.0256		21.5238		20	40	41
12	15		B2=	94.1235									12	34.6795		13.0952		15	20	60
