# Supplementary material
Source: publisher site journal article supplement (https://www.degruyterbrill.com/publication/isbn/9783486710663/downloadAsset/9783486710663_Anwendungen--de.zip)
Supplement: Supplementary file 54 [file A_1702_Trend_Gleitende_Durchschnitte.xls]

## Sheet: Simulation
Zeitreihenanalyse - Gleitende Durchschnitte												Variante 1
t	yt	gt(3)	gt(4)	gt(5)								Variante 2
1	10											Variante 3	10	8	10
2	30	30											30	12	12	11.6667
3	50	46.6667	45	44									50	27	13	13	13.25	13.4
4	60	60	58.75	58									60	9	14	15	15.625	16
5	70	70	66.25	64									70	15	18	18.3333	19.25	19.8
6	80	70	65	62									80	27	23	24	23	22.4
7	60	60	58.75	58									60	48	31	26.6667	28.625	29.8
8	40	46.6667	48.75	50									40	24	26	36	37.125	37.8
9	40	36.6667	37.5	38									40	32	51	45	46.625	47.6
10	30	30	29.375	29									30	52	58	60.3333	58.375	57.2
11	20	21.6667											20	75	72	69.6667
12	15												15	61	79
Summe		-	-	-
