# Supplementary material
Source: publisher site journal article supplement (https://www.degruyterbrill.com/publication/isbn/9783486710663/downloadAsset/9783486710663_Anwendungen--de.zip)
Supplement: Supplementary file 55 [file A_1703_Saisonkomponente_Tertiale.xls]

## Sheet: Simulation
Zeitreihenanalyse - Saison- und Restkomponente												Variante 1
t	j	i	yt	gt(3)	1. Tert.	2. Tert.	3. Tert.	st	rt			Variante 2
1	1	1	2					-2.49074				Variante 3	2	21	12
2	1	2	8	4.33333		3.66667		5.53704	-1.87037				8	22	13
3	1	3	3	5.66667			-2.66667	-3.0463	0.37963				3	23	14
4	1	1	6	8.33333	-2.33333			-2.49074	0.157407				6	22	15
5	2	2	16	11		5		5.53704	-0.537037				16	22	16
6	2	3	11	14.3333			-3.33333	-3.0463	-0.287037				11	24	17
7	2	1	16	17.3333	-1.33333			-2.49074	1.15741				16	25	18
8	2	2	25	20		5		5.53704	-0.537037				25	23	19
9	3	3	19	22			-3	-3.0463	0.0462963				19	24	20
10	3	1	22	25.6667	-3.66667			-2.49074	-1.17593				22	27	21
11	3	2	36	27.3333		8.66667		5.53704	3.12963				36	28	22
12	3	3	24					-3.0463					24	32	23
Summe			-	-	-7.33333	22.3333	-9	-	-
				si	-2.44444	5.58333	-3	=> Summe	0.138889
				si(norm)	-2.49074	5.53704	-3.0463	=> Summe	0
