# Supplementary material
Source: publisher site journal article supplement (https://www.degruyterbrill.com/publication/isbn/9783486710663/downloadAsset/9783486710663_Anwendungen--de.zip)
Supplement: Supplementary file 56 [file A_1704_Saisonkomponente_Quartale.xls]

## Sheet: Simulation1
Zeitreihenanalyse - Saison- und Restkomponente (3 Jahre)													Variante 1
t	j	i	yt	gt(4)	1. Qu.	2. Qu.	3. Qu.	4. Qu.	st	rt			Variante 2
1	1	1	10						6.5				Variante 3	10	5	34
2	1	2	5						-5.5					5	10	37
3	1	3	6	9.5			-3.5		-4.25	0.75				6	16	39
4	1	4	14	10.5				3.5	3.25	0.25				14	8	43
5	2	1	16	11	5				6.5	-1.5				16	20	47
6	2	2	7	11.75		-4.75			-5.5	0.75				7	26	49
7	2	3	8	13.375			-5.375		-4.25	-1.125				8	29	51
8	2	4	18	15.375				2.625	3.25	-0.625				18	21	55
9	3	1	25	17.375	7.625				6.5	1.125				25	23	58
10	3	2	14	20.625		-6.625			-5.5	-1.125				14	37	61
11	3	3	17						-4.25					17	39	65
12	3	4	35						3.25					35	33	69
Summe			-	-	12.625	-11.375	-8.875	6.125	-	-
				si	6.3125	-5.6875	-4.4375	3.0625	=> Summe	-0.75
				si(norm)	6.5	-5.5	-4.25	3.25	=> Summe	0

## Sheet: Simulation2
Zeitreihenanalyse - Saison- und Restkomponente (4 Jahre)													Variante 1
t	j	i	yt	gt(4)	1. Qu.	2. Qu.	3. Qu.	4. Qu.	st	rt			Variante 2
1	1	1	9						3.08333				Variante 3	9	110.5	110.5
2	1	2	8						-0.125					8	120	120
3	1	3	7	9.25			-2.25		-2.29167	0.0416667				7	108.5	108.5
4	1	4	10	10.75				-0.75	-0.666667	-0.0833333				10	149	149
5	2	1	15	12.125	2.875				3.08333	-0.208333				15	117.5	117.5
6	2	2	14	13.375		0.625			-0.125	0.75				14	130	130
7	2	3	12	14.625			-2.625		-2.29167	-0.333333				12	121.5	121.5
8	2	4	15	15.75				-0.75	-0.666667	-0.0833333				15	158	158
9	3	1	20	16.875	3.125				3.08333	0.0416667				20	119.5	119.5
10	3	2	18	18		0			-0.125	0.125				18	139	139
11	3	3	17	18.875			-1.875		-2.29167	0.416667				17	133.5	133.5
12	3	4	19	19.375				-0.375	-0.666667	0.291667				19	176	176
13	4	1	23	19.625	3.375				3.08333	0.291667				23	140.5	140.5
14	4	2	19	19.875		-0.875			-0.125	-0.75				19	144	144
15	4	3	18						-2.29167					18	146.5	146.5
16	4	4	20						-0.666667					20	177	177
Summe			-	-	9.375	-0.25	-6.75	-1.875	-	-
				si	3.125	-0.0833333	-2.25	-0.625	=> Summe	0.166667
				si(norm)	3.08333	-0.125	-2.29167	-0.666667	=> Summe	0
