# Supplementary material
Source: publisher site journal article supplement (https://www.degruyterbrill.com/publication/isbn/9783486710663/downloadAsset/9783486710663_Anwendungen--de.zip)
Supplement: Supplementary file 57 [file A_1705_Exponentielle_Glttung.xls]

## Sheet: Simulation
													Variante 1	alpha	0.3
t	yt	Exp.Glätt.	Exp.Glätt.										Variante 2	yt	yt	yt
		0.3	0.7										Variante 3
1	-1.2													-1.2	-2	-1
2	-1	-1.2	-1.2											-1	-1	2
3	-0.1	-1.14	-1.06											-0.1	0	-1
4	0.1	-0.828	-0.388											0.1	0	2
5	1	-0.5496	-0.0464											1	2	-1
6	2	-0.08472	0.68608											2	1	2
7	-0.3	0.540696	1.60582											-0.3	5	-1
8	-0.4	0.288487	0.271747											-0.4	6	2
9	1.5	0.081941	-0.198476											1.5	8	-1
10	1	0.507359	0.990457											1	9	2
11	-	0.655151	0.997137
		alpha	0.3
