# Supplementary material
Source: publisher site journal article supplement (https://www.degruyterbrill.com/publication/isbn/9783486710663/downloadAsset/9783486710663_Anwendungen--de.zip)
Supplement: Supplementary file 58 [file A_1706_Prognose_Saisonbereinigung.xls]

## Sheet: Simulation
Zeitreihenanalyse (Prognose mit Saisonbereinigung)													Variante 1
t	j	i	yt	gt	1. Qu.	2. Qu.	3. Qu.	4. Qu.	st	sber.R.			Variante 2
1	1	1	20	25.8974	-5.89744				-9.22203	29.222			Variante 3	20	21	21
2	1	2	30	28.0828		1.91725			1.09266	28.9073			Achsenab.	30	24	24
3	1	3	40	30.2681			9.73193		8.90734	31.0927			23.7121	40	30	30
4	1	4	30	32.4534				-2.45338	-0.777972	30.778			Steig.	30	36	36
5	2	1	25	34.6387	-9.63869				-9.22203	34.222			2.18531	25	40	34
6	2	2	40	36.824		3.17599			1.09266	38.9073				40	44	24
7	2	3	50	39.0093			10.9907		8.90734	41.0927				50	49	20
8	2	4	45	41.1946				3.80536	-0.777972	45.778				45	55	18
9	3	1	30	43.38	-13.38				-9.22203	39.222				30	40	20
10	3	2	40	45.5653		-5.56527			1.09266	38.9073				40	44	17
11	3	3	55	47.7506			7.24942		8.90734	46.0927				55	49	17
12	3	4	50	49.9359				0.0641026	-0.777972	50.778				50	55	16
13	3	1	42.8992	52.1212					-9.22203	52.1212
14	3	2	55.3992	54.3065					1.09266	54.3065
15	3	3	65.3992	56.4918					8.90734	56.4918
16	3	4	57.8992	58.6772					-0.777972	58.6772
Summe					-15.5361	5.09324	20.7226	1.35198	0	-
				si	-7.76807	2.54662	10.3613	0.675991	=> Summe	5.81585
				si(norm)	-9.22203	1.09266	8.90734	-0.777972	=> Summe	0
