# Supplementary material
Source: publisher site journal article supplement (https://www.degruyterbrill.com/publication/isbn/9783486710663/downloadAsset/9783486710663_Anwendungen--de.zip)
Supplement: Supplementary file 59 [file A_1801_Wahrscheinlichkeit.xls]

## Sheet: Simulation
Wahrscheinlichkeit: Würfelwurf
Grund-	Ergebnis	Stichproben-	Absolute	Relative													50
gesamtheit	Experiment	wert	Häufigkeit	Häufigkeit													120
"Würfel"	n = 1			W-keit									3		1		200
1		1											6		2		300
				0.166667											3		400
2		2													4		500
				0.166667											5		600
3		3													6		1000
				0.166667												0.166667	1200
4		4														0.166667	2000
				0.166667												0.166667	2400
5		5														0.166667	3000
				0.166667												0.166667
6		6														0.166667
				0.166667
		Summe
				1
	Anzahl
	Experimente					Ziehung			Anzahl:
						der
						Zufalls-		=>	1 Stichpr.
						Stichproben
