# Supplementary material
Source: publisher site journal article supplement (https://www.degruyterbrill.com/publication/isbn/9783486710663/downloadAsset/9783486710663_Anwendungen--de.zip)
Supplement: Supplementary file 60 [file A_1802_Wahrscheinlichkeitsbaum.xls]

## Sheet: Übung
Wahrscheinlichkeitsbaum												Wahrscheinlichkeitsbaum									Variante 1	Variante 2	Variante 3
				0												0					A	A	A
																					0.9	0.8	0.5
		A												A							B/A	B/A	B/A
		0.9				0.1								0.9				0.1			0.8	0.7	0.7
																					B/Aq	B/Aq	B/Aq
	B				B								B				B				0.8	0.6	0.6
	0.8		0.2		0.8		0.2						0.8		0.2		0.8		0.2		Variante 1
																					Variante 2
													P(A+B)		P(A+Bq)		P(Aq+B)		P(Aq+Bq)		Variante 3
													0.72		0.18		0.08		0.02
														0.9		0.8

## Sheet: Simulation
Wahrscheinlichkeitsbaum												Variante 1
				0								Variante 2
												Variante 3
		A											0.9
		0.9				0.1							0.9	0.9
													0.9
	B				B								0.8	0.7
	0.9		0.1		0.9		0.1						0.5
													0.8	0.7
	0.81		0.09		0.09		0.01
		0.9		0.9
