# Supplementary material
Source: publisher site journal article supplement (https://www.degruyterbrill.com/publication/isbn/9783486710663/downloadAsset/9783486710663_Anwendungen--de.zip)
Supplement: Supplementary file 61 [file A_1803_Totale_Wahrscheinlichkeit.xls]

## Sheet: Simulation
Wahrscheinlichkeitsbaum (Totale Wahrscheinlichkeit)												Variante 1
				0								Variante 2
												Variante 3
		A											0.8
		0.8				0.2							0.63	0.72
													0.8
	B				B								0.8	0.8
	0.63		0.37		0.72		0.28						0.7
													0.666	0.63
	0.504		0.296		0.144		0.056
	P(A) =	0.8	P(B) =	0.648	P(A).P(B|A) =		0.504
	P(B|A) =	0.63			P(A).P(B) =		0.5184
