# Supplementary material
Source: publisher site journal article supplement (https://www.degruyterbrill.com/publication/isbn/9783486710663/downloadAsset/9783486710663_Anwendungen--de.zip)
Supplement: Supplementary file 62 [file A_1804_Zweidim+Bedingte_Wahrsch.xls]

## Sheet: Simulation1
Zweidimensionale und bedingte Wahrscheinlichkeiten										Variante 1
	Variable Y		y1	y2	Summe			2		Variante 2
Variable X			B					2		Variante 3
x1	A	2-dim W.	0.2	0.3	0.5						0.2	0.45	0.25
		Bedingte W.	0.4	0.6	1			Abhängigkeit			0.3	0.05	0.25
x2		2-dim W.	0.3	0.2	0.5
		Bedingte W.	0.6	0.4	1
Summe			0.5	0.5	1
			Abhängigkeit

## Sheet: Simulation2
Zweidimensionale und bedingte Wahrscheinlichkeiten										Variante 1
	Variable Y		y1	y2	Summe			2		Variante 2
Variable X			B					2		Variante 3
x1	A	2-dim W.	0.2	0.4	0.6						0.2	0.4	0.3
		Bedingte W.	0.333333	0.666667	1			Abhängigkeit			0.3	0.1	0.2
x2		2-dim W.	0.3	0.1	0.4
		Bedingte W.	0.75	0.25	1
Summe			0.5	0.5	1
			Abhängigkeit
