# Supplementary material
Source: publisher site journal article supplement (https://www.degruyterbrill.com/publication/isbn/9783486710663/downloadAsset/9783486710663_Anwendungen--de.zip)
Supplement: Supplementary file 63 [file A_1805_Kombinatorik.xls]

## Sheet: Simulation
Kombinatorik									Variante 1	Ziehung von k Elementen	2	aus Gesamtheit mit n Elementen	6
									Variante 2		4		10
Anzahl Kombinationen für		Ziehung von k Elementen	2	aus Gesamt- heit mit n Elementen	6				Variante 3		6		49
	Beachtung der Reihenfolge	mit		ohne
Zurücklegen
mit			36		21
ohne			30		15
