# Supplementary material
Source: publisher site journal article supplement (https://www.degruyterbrill.com/publication/isbn/9783486710663/downloadAsset/9783486710663_Anwendungen--de.zip)
Supplement: Supplementary file 64 [file A_1901_Zufallsvariable_Verteilung.xls]

## Sheet: Übung
Zufallsvariable X und Wahrscheinlichkeitsverteilung: 2-stufig											Variante 1	Wahrscheinlichkeitsbaum									Variante 1	Variante 2	Variante 3
				0							Variante 2					0					A	A	A
											Variante 3										0.9	0.9	0.8
		A												A							B/A	B/A	B/A
		0.9				0.1								0.9				0.1			0.7	0.8	0.6
																					B/Aq	B/Aq	B/Aq
	B				B								B				B				0.7	0.7	0.5
	0.7		0.3		0.7		0.3						0.7		0.3		0.7		0.3
													P(A+B)		P(A+Bq)		P(Aq+B)		P(Aq+Bq)
													0.63		0.27		0.07		0.03
	wobei		wobei		wobei		wobei
	X = 2		X = 1		X = 1		X = 0
														0.9		0.7

## Sheet: Simulation1
Zufallsvariable X und Wahrscheinlichkeitsverteilung: 2-stufig												Variante 1	Var 1	Var 2	Var 3
				0								Variante 2	0.9	0.9	0.9
												Variante 3	0.8	0.9	0.7
		A											0.8	0.9	0.8
		0.9				0.1
	B				B
	0.8		0.2		0.8		0.2
	0.72		0.18		0.08		0.02
	wobei		wobei		wobei		wobei
	X = 2		X = 1		X = 1		X = 0

## Sheet: Simulation2
Zufallsvariable X und Wahrscheinlichkeitsverteilung: 3-stufig, unabhängig																											Variante 1	Var 1	Var 2	Var 3
												0															Variante 2	0.9	0.9	0.8
						A																					Variante 3	0.8	0.6	0.8
					0.9												0.1											0.7	0.4	0.8
			B												B
		0.8						0.2						0.8						0.2
	C						C						C						C
	0.7			0.3			0.7			0.3			0.7			0.3			0.7			0.3
	0.504			0.216			0.126			0.054			0.056			0.024			0.014			0.006
	wobei			wobei			wobei			wobei			wobei			wobei			wobei			wobei
	X = 3			X = 2			X = 2			X = 1			X = 2			X =1			X = 1			X = 0

## Sheet: Simulation3
Zufallsvariable X und Wahrscheinlichkeitsverteilung: 2-stufig																											Variante 1	Var 1	Var 2	Var 3
												0															Variante 2	0.9	0.9	0.8
						A																					Variante 3	0.8	0.6	0.8
					0.9												0.1											0.7	0.4	0.8
																												0.9	0.8	0.8
			B												B													0.8	0.7	0.8
		0.8						0.2						0.7						0.3								0.7	0.9	0.8
																												0.6	0.6	0.8
	C						C						C						C
	0.9			0.1			0.8			0.2			0.7			0.3			0.6			0.4
	0.648			0.072			0.144			0.036			0.049			0.021			0.018			0.012
	wobei			wobei			wobei			wobei			wobei			wobei			wobei			wobei
	X = 3			X = 2			X = 2			X = 1			X = 2			X =1			X = 1			X = 0
