# Supplementary material
Source: publisher site journal article supplement (https://www.degruyterbrill.com/publication/isbn/9783486710663/downloadAsset/9783486710663_Anwendungen--de.zip)
Supplement: Supplementary file 65 [file A_1902_Diskrete_Verteilung.xls]

## Sheet: Simulation
Wahrscheinlichkeits- und Verteilungsfunktion																			Var 1	Var 2	Var 3
j	xj	fj	Fj										j	xj	fj	hj	Hj	Variante 1	0.25	0.4	0.2
1	0	0.25	0.25									0.25		0			0	Variante 2	0.25	0.3	0.3
2	1	0.25	0.5									0.25		1			0	Variante 3	0.25	0.2	0.3
3	2	0.25	0.75									0.25		0		0	0		0.25	0.1	0.2
4	3	0.25	1									0.25		0		0.25
Summe	_	1	_									1		0			0.25
												0		1		0	0.25
												0		1		0.25
												0		1			0.5
												0		2		0	0.5
														2		0.25
														2			0.75
														3		0	0.75
														3		0.25
														3			1
														4			1
														4
														4
													Su.	-	0
