# Supplementary material
Source: publisher site journal article supplement (https://www.degruyterbrill.com/publication/isbn/9783486710663/downloadAsset/9783486710663_Anwendungen--de.zip)
Supplement: Supplementary file 66 [file A_1903_Stetige_Verteilung.xls]

## Sheet: Simulation1
Stetige Verteilung: Dichtefunktion											Variante 1
											Variante 2	50	0.000102819	100	0
Normalverteilung											Variante 3	55	0.000295457	100	0.0265962	0.5	34.1345
											Variante 4	60	0.000759732
Erwartungswert		100									Variante 5	65	0.00174813	115	0
Standardabw.		15									Variante 6	70	0.0035994	115	0.0161314	0.841345
											Var 1	75	0.00663181
Intervall für die											100	80	0.010934	100	0
Wahrscheinlichkeit											115	85	0.0161314	115	0
											Var 2	90	0.0212965
Untergrenze U		100									85	95	0.0251589
											115	100	0.0265962
Obergrenze O		115									Var 3	105	0.0251589
											115	110	0.0212965
P(U<=X<=O)		34.1345									150	115	0.0161314
in %											Var 4	120	0.010934
											130	125	0.00663181
											150	130	0.0035994
											Var 5	135	0.00174813
											50	140	0.000759732
											80	145	0.000295457
											Var 6	150	0.000102819
											120
											120

## Sheet: Simulation2
Stetige Verteilung: Verteilungsfunktion										1	Variante 1
											Variante 2	50	0.000429117	100	0
Normalverteilung											Variante 3	55	0.00134997	100	0.5	0.5	34.1345
											Variante 4	60	0.00383043
Erwartungswert		100									Variante 5	65	0.00981531	115	0
Standardabw.		15									Variante 6	70	0.0227501	115	0.841345	0.841345
											Var 1	75	0.0477903
Intervall für die										150	100	80	0.0912113	50	0.5
Wahrscheinlichkeit										170	115	85	0.158655	100	0.5
											Var 2	90	0.252492
Untergrenze U		100									85	95	0.369441	50	0.841345
P(X<=U)		0.5									115	100	0.5	115	0.841345
											Var 3	105	0.630559
Obergrenze O		115									115	110	0.747508
P(X>=O)		0.841345									150	115	0.841345
											Var 4	120	0.908789
P(U<=X<=O)		34.1345									130	125	0.95221
in %											150	130	0.97725
											Var 5	135	0.990185
											50	140	0.99617
											80	145	0.99865
											Var 6	150	0.999571
											120
											120
