# Supplementary material
Source: publisher site journal article supplement (https://www.degruyterbrill.com/publication/isbn/9783486710663/downloadAsset/9783486710663_Anwendungen--de.zip)
Supplement: Supplementary file 67 [file A_1904_Diskrete_Vert_Lage+Streuung.xls]

## Sheet: Simulation
Diskrete Verteilung: Lage + Streuung									Variante 1
		2. Münzwurf	K = Kopf	Z = Zahl	P(X1)				Variante 2
	1. Münzwurf								Variante 3
	K = Kopf		0.25	0.25	0.5					G	G	G
	Z = Zahl		0.25	0.25	0.5					-1	-5	1
	P(X2)		0.5	0.5	1					0	0	2
										2	5	3
	X	P(X)	G	G*P	Abw.quadr.*P
	0	0.25	-1	-0.25	0.390625
	1	0.5	0	0	0.03125
	2	0.25	2	0.5	0.765625
			Summe	0.25	1.1875
