# Supplementary material
Source: publisher site journal article supplement (https://www.degruyterbrill.com/publication/isbn/9783486710663/downloadAsset/9783486710663_Anwendungen--de.zip)
Supplement: Supplementary file 68 [file A_1905_Diskrete_Vert_Lage+Strg_grafisch.xls]

## Sheet: Simulation1
Wahrscheinlichkeitsfunktion, Erwartungswert und Streuung																			Variante 1
j	xj	gj	fj	gjfj										j	xj	fj	hj	Hj	Variante 2	gj	gj	gj
1	0	-1	0.25	-0.25	0.390625								0.25		0			0	Variante 3	-1	-2	-4
2	1	0	0.5	0	0.03125								0.5		1			0		0	0	0
3	2	2	0.25	0.5	0.765625								0.25		-1		0	0		2	2	1
Summe	-	-	1	0.25	1.1875								#REF!		-1		0.25
													#REF!		-1			-0.25
	Zufallsexperiment:												Erw.wert		0		0	-0.25
	2-maliger Münzwurf														0		0.5
													0.25		0			0
													0.25		2		0	0
													0		2		0.25
													-0.839725		2			0.5
													1.33972
													0
													0
														Su.	-	0

## Sheet: Simulation2
Wahrscheinlichkeitsfunktion, Erwartungswert und Varianz																			Variante 1
j	xj	fj	xjfj	(xj-E(X))2	(xj-E(X))2fj									j	xj	fj	hj	Hj	Variante 2	fj	fj	fj	fj	fj
1	1	0.166667	0.166667	6.25	1.04167								0.166667		0			0	Variante 3	0.166667	0.1	0.5	0.4	0.166667
2	2	0.166667	0.333333	2.25	0.375								0.166667		1			0	Variante 4	0.166667	0.2	0.5	0.3	0.166667
3	3	0.166667	0.5	0.25	0.0416667								0.166667		1		0	0		0.166667	0.2		0.2	0.166667
4	4	0.166667	0.666667	0.25	0.0416667								#REF!		1		0.166667			0.166667	0.2		0.1	0.166667
5	5	0.166667	0.833333	2.25	0.375								#REF!		2			0.166667		0.166667	0.2			0.166667
6	6	0.166667	1	6.25	1.04167								Erw.wert		2		0	0.166667		0.166667	0.1			0.166667
Summe	-	1	3.5	-	2.91667										2		0.166667							1
													3.5		3			0.333333
	Zufallsexperiment:												3.5		3		0	0.333333
	Ziehen aus Urne												0		3		0.166667
													5.20783		4			0.5
													1.79217		4		0
													0		4		0.166667
													0		5
															5		0
															5		0.166667
															6
															6		0
															6		0.166667
														Su.	-	0
