# Supplementary material
Source: publisher site journal article supplement (https://www.degruyterbrill.com/publication/isbn/9783486710663/downloadAsset/9783486710663_Anwendungen--de.zip)
Supplement: Supplementary file 69 [file A_1906_Stetige_Vert_Lage+Strg_grafisch.xls]

## Sheet: Simulation
Stetige Verteilung: Lage und Streuung												X	Df(x)	Streubereich	Variante 1
												80	0.000316618	125	Variante 2
												85	0.000543319	175	Variante 3	Var 1	Var 2	Var 3
												90	0.000895781	0	Variante 4	150	150	120
Normalverteilung												95	0.00141898	0	Variante 5	25	15	15
												100	0.00215964		Variante 6	Var 4	Var 5	Var 5
Erwartungswert		150										105	0.00315801			100	100	100
												110	0.00443683			15	12	8
												115	0.0059891
Standardabw.		25										120	0.00776744
												125	0.00967883
												130	0.0115877
												135	0.013329
												140	0.0147308
												145	0.0156417
												150	0.0159577
												155	0.0156417
												160	0.0147308
												165	0.013329
												170	0.0115877
												175	0.00967883
												180	0.00776744
												185	0.0059891
												190	0.00443683
												195	0.00315801
												200	0.00215964
												205	0.00141898
												210	0.000895781
												215	0.000543319
