# Supplementary material
Source: publisher site journal article supplement (https://www.degruyterbrill.com/publication/isbn/9783486710663/downloadAsset/9783486710663_Anwendungen--de.zip)
Supplement: Supplementary file 70 [file A_2001_Binomialverteilung_Experiment.xls]

## Sheet: Simulation1
Binomialverteilung: Das Bernoulli-Experiment															Werte für Grafik
	Anzahl N		Grund-		Häufigkeit		Erfolge in								0	#REF!			Element	Treffer	Prüfung	5
	Elemente		gesamtheit		in		Stichprobe								1	#REF!			in	in		10
	in der Urne		"Urne"		Stichprobe		n = 4						6		2	#REF!			Stichprobe	Stichprobe		20
	10		1	=>									1		3	#REF!			1	1	1	50
															4	#REF!						100
	1-er in		1	=>											5	#REF!			0	0	1
	der Urne												für Häufigkeit 1		6	#REF!
	( = M)		1	=>									1		7	#REF!			0	0	1
	5												5		8	#REF!
			1	=>											9	#REF!			0	0	1
	Anteil p														10	#REF!
	(= M / N)		1	=>			Anzahl												0	0	1
							Experimente					Grundges.	Binom-Ziehung	Ergebnis 1	Ergebnis 2	Ergebnis 3	Ergebnis 4	Treffer
	0.5		0	=>								1	7			1		1	0	0	0
												1	7					0
			0	=>								1	1					0	2	0	0
												1	8					0
			0	=>								1	6					0	1	0	0
							Ziehung		Anzahl:			0	5					0
			0	=>			der					0	7	1	1			2	0	0	0
							Zufalls-		=> 1 Stichpr.			0	9				1	1
			0	=>			Stichproben					0	9					0	0	0	0
												0	8					0
													Summe	1	1	1	1		4	1

## Sheet: Simulation2
Binomialverteilung: Entstehung der Verteilung															Werte für Grafik
Grund-	Anzahl N	Erfolge in	Werte der	Absolute	Relative										0		0.0256		Element	Treffer	Prüfung	50
gesamtheit	Elemente	Stichprobe	Zufalls-	Häufigkeit	Häufigkeit										1		0.1536		in	in		100
"Urne"	in der Urne	n = 4	variablen X	der Erfolge	W-keit								2		2		0.3456		Stichprobe	Stichprobe		200
1	10		0										1		3		0.3456		0	0	#REF!	300
															4		0.1296					400
1	1-er in				0.0256										5	#REF!			0	0	#REF!	500
	der Urne		1										für Häufigkeit 1		6							1000
1	( = M)												1		7	0.3456			0	0	#REF!
	6				0.1536								6		8
1			2												9	0.1296			2	2	#REF!
	Anteil p														10	#REF!
1	(= M / N)				0.3456														0	0	#REF!
			3									Grundges.	Binom-Ziehung	Ergebnis 1	Ergebnis 2	Ergebnis 3	Ergebnis 4	Treffer
1	0.6											1	7					0	0	0	#REF!
					0.3456							1	4					0
0			4									1	8					0	1	0	#REF!
												1	4		1		1	2
0					0.1296							1	10					0	1	0	#REF!
	Anzahl		Summe				Ziehung		Anzahl:			1	1					0
0	Experimente				1		der					0	6	1				1	0	0	#REF!
							Zufalls-		=> 1 Stichpr.			0	2			1		1
0							Stichproben					0	8					0	0	0	#REF!
												0	9					0
													Summe	1	1	1	1		4	2
