# Supplementary material
Source: publisher site journal article supplement (https://www.degruyterbrill.com/publication/isbn/9783486710663/downloadAsset/9783486710663_Anwendungen--de.zip)
Supplement: Supplementary file 71 [file A_2002_Binomialverteilung.xls]

## Sheet: Simulation
Binomialverteilung											Erw.w. Stabw./Grafik		Variante 1
Stichprobenumfang		X	B(x|n;p)	Vert.fkt.							1.5	0.45	Variante 2
n =	5	0	0.59049	0.59049							Streubereich/Grafik		Variante 3
		1	0.32805	0.91854							0.82918	2.17082	Variante 4	5	8	10
Anteilswert		2	0.0729	0.99144							0	0	Variante 5	0.1	0.1	0.1
p =	0.1	3	0.0081	0.99954									Variante 6	10	10	10
		4	0.00045	0.99999										0.2	0.3	0.5
Erwartungswert		5	1e-05	1
E(X) =	0.5	6
		7
Varianz		8
V(X) =	0.45	9
		10
		Summe	1	-
