# Supplementary material
Source: publisher site journal article supplement (https://www.degruyterbrill.com/publication/isbn/9783486710663/downloadAsset/9783486710663_Anwendungen--de.zip)
Supplement: Supplementary file 72 [file A_2003_Hypergeometrische_Verteilung.xls]

## Sheet: Simulation
Hypergeometrische Verteilung											Erwartungswert/Grafik		Variante 1
Stichprobenumfang		X	H(x|n;N;M)	Vert.fkt.							1.9		Variante 2
n =	3	0	0.291667	0.291667							Var	0.49	Variante 3
		1	0.525	0.816667							0	0	Variante 4	3	3	5
Grundgesamtheit		2	0.175	0.991667							1.41	2.39	Variante 5	10	10	10
N =	10	3	0.00833333	1							Minimum	10	Variante 6	3	5	5
		4												10	10	10
Erfolge Grundges.		5												100	100	100
M =	3	6												50	30	20
		7
Erwartungswert		8
E(X) =	0.9	9
Varianz		10
V(X) =	0.49	Summe	1	-
