# Supplementary material
Source: publisher site journal article supplement (https://www.degruyterbrill.com/publication/isbn/9783486710663/downloadAsset/9783486710663_Anwendungen--de.zip)
Supplement: Supplementary file 73 [file A_2004_Poissonverteilung.xls]

## Sheet: Simulation
Poissonverteilung											Erwartungswert/Grafik		X	Poiss-P	Variante 1
Erwartungswert											4				Variante 2	0.1	0.5	1	5	10
	3												0	0.0497871	Variante 3
													1	0.149361	Variante 4	0	0
X		X											2	0.224042	Variante 5	2.26795	5.73205
0	0.0497871	16	1.02432e-07										3	0.224042
1	0.149361	17	1.80763e-08										4	0.168031
2	0.224042	18	3.01272e-09										5	0.100819
3	0.224042	19	4.75692e-10										6	0.0504094
4	0.168031	20	7.13538e-11										7	0.021604
5	0.100819	21	1.01934e-11										8	0.00810151
6	0.0504094	22	1.39001e-12										9	0.0027005
7	0.021604	23	1.81306e-13										10	0.000810151
8	0.00810151	24	2.26632e-14										11	0.00022095
9	0.0027005	25	2.71958e-15										12	5.52376e-05
10	0.000810151	26	3.13798e-16										13	1.27471e-05
11	0.00022095	27	3.48664e-17										14	2.73153e-06
12	5.52376e-05	28	3.73569e-18										15	5.46306e-07
13	1.27471e-05	29	3.86451e-19										16	1.02432e-07
14	2.73153e-06	30	3.86451e-20										17	1.80763e-08
15	5.46306e-07	Summe	1										18	3.01272e-09
													19	4.75692e-10
													20	7.13538e-11
													21	1.01934e-11
													22	1.39001e-12
													23	1.81306e-13
													24	2.26632e-14
													25	2.71958e-15
													26	3.13798e-16
													27	3.48664e-17
													28	3.73569e-18
													29	3.86451e-19
													30	3.86451e-20
