# Supplementary material
Source: publisher site journal article supplement (https://www.degruyterbrill.com/publication/isbn/9783486710663/downloadAsset/9783486710663_Anwendungen--de.zip)
Supplement: Supplementary file 74 [file A_2101_Normalverteilung.xls]

## Sheet: Simulation
Normalverteilungen										Normalverteilungen			Variante 1
1. Normalverteilung										-5	7.4336e-07	5.86899e-35	Variante 2
E(X) =	5									-4.5	2.51475e-06	1.19307e-31	Variante 3
										-4	7.99187e-06	1.64105e-28		5	8	0
										-3.5	2.38593e-05	1.52733e-25		2	3	1
	2									-3	6.69151e-05	9.61825e-23		5	5	2
										-2.5	0.000176298	4.09839e-20		0.8	3	3
2. Normalverteilung										-2	0.000436341	1.18164e-17
E(X) =	5									-1.5	0.00101452	2.3052e-15		0	0
										-1	0.00221592	3.0429e-13		3	7
										-0.75	0.00319906	3.01967e-12		0.01	0.01
	0.8									-0.5	0.00454678	2.71782e-11		4.2	5.8
										-0.25	0.00636209	2.21855e-10
										0	0.00876415	1.6425e-09
										0.25	0.011886	1.10289e-08
										0.5	0.0158698	6.71654e-08
										0.75	0.0208605	3.70978e-07
										1	0.0269955	1.8584e-06
										1.25	0.0343931	8.44342e-06
										1.5	0.0431387	3.47925e-05
										1.75	0.0532691	0.00013003
										2	0.0647588	0.000440745
										2.25	0.0775061	0.00135494
										2.5	0.0913245	0.00377782
										2.75	0.105938	0.00955326
										3	0.120985	0.0219104
										3.25	0.136027	0.045576
										3.5	0.150569	0.0859828
										3.75	0.16408	0.147121
										4	0.176033	0.228311
										4.25	0.185928	0.321342
										4.5	0.193334	0.410201
										5	0.199471	0.498678
										5.5	0.193334	0.410201
										6	0.176033	0.228311
										6.5	0.150569	0.0859828
										7	0.120985	0.0219104
										7.5	0.0913245	0.00377782
										8	0.0647588	0.000440745
										8.5	0.0431387	3.47925e-05
										9	0.0269955	1.8584e-06
										9.5	0.0158698	6.71654e-08
										10	0.00876415	1.6425e-09
										10.5	0.00454678	2.71782e-11
										11	0.00221592	3.0429e-13
										11.5	0.00101452	2.3052e-15
										12	0.000436341	1.18164e-17
										12.5	0.000176298	4.09839e-20
										13	6.69151e-05	9.61825e-23
										13.5	2.38593e-05	1.52733e-25
										14	7.99187e-06	1.64105e-28
										14.5	2.51475e-06	1.19307e-31
										15	7.4336e-07	5.86899e-35
