# Supplementary material
Source: publisher site journal article supplement (https://www.degruyterbrill.com/publication/isbn/9783486710663/downloadAsset/9783486710663_Anwendungen--de.zip)
Supplement: Supplementary file 75 [file A_2102_Normverteilung_Quantile.xls]

## Sheet: Simulation1
Normalverteilung: Quantile										Normalverteilungen				Variante 1	E	0	0	3
Normalverteilung										-5	2.87105e-07	1.64485	0	Variante 2	S	1	1	1
E(X) =	0									-4.5	3.4008e-06	1.64485	0.95	Variante 3	W	0.95	0.975	0.9
										-4	3.1686e-05	0	0.95
										-3.5	0.000232673
	1									-3	0.00134997
										-2.5	0.00620968
Quantil										-2	0.0227501
Wahrschein-	0.95									-1.5	0.0668072
lichkeit										-1	0.158655
										-0.75	0.226627
Quantil	1.64485									-0.5	0.308538
										-0.25	0.401294
										0	0.5
										0.25	0.598706
										0.5	0.691462
										0.75	0.773373
										1	0.841345
										1.25	0.89435
										1.5	0.933193
										1.75	0.959941
										2	0.97725
										2.25	0.987776
										2.5	0.99379
										2.75	0.99702
										3	0.99865
										3.25	0.999423
										3.5	0.999767
										3.75	0.999912
										4	0.999968
										4.25	0.999989
										4.5	0.999997
										5	1
										5.5	1
										6	1
										6.5	1
										7	1
										7.5	1
										8	1
										8.5	1
										9	1
										9.5	1
										10	1
										10.5	1
										11	1
										11.5	1
										12	1
										12.5	1
										13	1
										13.5	1
										14	1
										14.5	1
										15	1

## Sheet: Simulation2
Normalverteilung: Wahrscheinlichkeiten (Quantile, invers)										Normalverteilungen				Variante 1	E	0	0	3
Normalverteilung										-5	2.87105e-07	1.645	0	Variante 2	S	1	1	1
E(X) =	0									-4.5	3.4008e-06	1.645	0.950015	Variante 3	Q	1.645	1	4
										-4	3.1686e-05	0	0.950015
										-3.5	0.000232673
	1									-3	0.00134997
										-2.5	0.00620968
Quantil										-2	0.0227501
Wahrschein-	0.950015									-1.5	0.0668072
lichkeit										-1	0.158655
										-0.75	0.226627
Quantil	1.645									-0.5	0.308538
										-0.25	0.401294
										0	0.5
										0.25	0.598706
										0.5	0.691462
										0.75	0.773373
										1	0.841345
										1.25	0.89435
										1.5	0.933193
										1.75	0.959941
										2	0.97725
										2.25	0.987776
										2.5	0.99379
										2.75	0.99702
										3	0.99865
										3.25	0.999423
										3.5	0.999767
										3.75	0.999912
										4	0.999968
										4.25	0.999989
										4.5	0.999997
										5	1
										5.5	1
										6	1
										6.5	1
										7	1
										7.5	1
										8	1
										8.5	1
										9	1
										9.5	1
										10	1
										10.5	1
										11	1
										11.5	1
										12	1
										12.5	1
										13	1
										13.5	1
										14	1
										14.5	1
										15	1
