# Supplementary material
Source: publisher site journal article supplement (https://www.degruyterbrill.com/publication/isbn/9783486710663/downloadAsset/9783486710663_Anwendungen--de.zip)
Supplement: Supplementary file 76 [file A_2103_Chi-Quadrat-Verteilung_Quantile.xls]

## Sheet: Simulation
Chi-Quadrat-Verteilung: Quantile und Wahrscheinlichkeiten												Variante 1	Fg	5	5	20
												Variante 2	W	0.005	0.1	0.99
			Freiheitsgrade		5							Variante 3	Q	0.41	1.61	37.57
	Wahrscheinlichkeit		0.005		Quantil		0.41
	Quantil		0.411751		Wahrscheinlichkeit		0.00495032
