# Supplementary material
Source: publisher site journal article supplement (https://www.degruyterbrill.com/publication/isbn/9783486710663/downloadAsset/9783486710663_Anwendungen--de.zip)
Supplement: Supplementary file 77 [file A_2104_t-Verteilung_Quantile.xls]

## Sheet: Simulation
t-Verteilung: Quantile und Wahrscheinlichkeiten												Variante 1	Fg	3	10	30
												Variante 2	W	0.95	0.95	0.95
			Freiheitsgrade		3							Variante 3	Q	2.353	1.812	1.697
	Wahrscheinlichkeit		0.95		Quantil		2.353
	Quantil		2.35336		Wahrscheinlichkeit		0.949984
