# Supplementary material
Source: publisher site journal article supplement (https://www.degruyterbrill.com/publication/isbn/9783486710663/downloadAsset/9783486710663_Anwendungen--de.zip)
Supplement: Supplementary file 78 [file A_2105_F-Verteilung_Quantile.xls]

## Sheet: Simulation
F-Verteilung: Quantile und Wahrscheinlichkeiten												Variante 1	Fg n	5	10	5
												Variante 2	Fg n	5	5	20
	Freiheitsgrade			n =	5	m =	5					Variante 3	W	0.975	0.975	0.975
													Q	7.146	4.24	6.33
	Wahrscheinlichkeit		0.975		Quantil		7.146
	Quantil		7.14635		Wahrscheinlichkeit		0.974997
