# Supplementary material
Source: publisher site journal article supplement (https://www.degruyterbrill.com/publication/isbn/9783486710663/downloadAsset/9783486710663_Anwendungen--de.zip)
Supplement: Supplementary file 79 [file A_2201_Approx_Hypergeom_Binomialvert.xls]

## Sheet: Simulation
Approximation: Hypergeometrische Verteilung an Binomialverteilung												H(n;N;M)	B(n;p)	Variante 1
Hypergeom. Verteilung											0	0.375645	0.4096	Variante 2
											1	0.462332	0.4096	Variante 3
n =	4										2	0.148607	0.1536		4	4	4
											3	0.0132095	0.0256		20	40	100
N =	20										4	0.000206398	0.0016		4	10	10
											5	#NUM!	#NUM!
M =	4										6	#NUM!	#NUM!
											7	#NUM!	#NUM!
E(X)=n.M/N	0.8										8	#NUM!	#NUM!
											9	#NUM!	#NUM!
V(X)	0.538947										10	#NUM!	#NUM!
n/N <= 0,05?	0.2											0.8	1
Binomialverteilung												0.8
n =	4
p =	0.2
E(X)=n.p	0.8
V(X)	0.64
