# Supplementary material
Source: publisher site journal article supplement (https://www.degruyterbrill.com/publication/isbn/9783486710663/downloadAsset/9783486710663_Anwendungen--de.zip)
Supplement: Supplementary file 80 [file A_2202_Approx_Poisson_Binomialvert.xls]

## Sheet: Simulation
Approximation: Poissonverteilung an Binomialverteilung												B(n;p)	Po(l)	6	Variante 1
Binomialverteilung											0	0.000797923	0.00247875	6	Variante 2
											1	0.00683934	0.0148725	1	Variante 3
n =	20										2	0.0278459	0.0446175		Variante 4	20	30	30	50
											3	0.0716037	0.0892351			0.3	0.2	0.1	0.1
p =	0.3										4	0.130421	0.133853
											5	0.178863	0.160623
E(X) = n . p	6										6	0.191639	0.160623
											7	0.164262	0.137677
n >= 30 ? und	p <= 0,1 ?										8	0.114397	0.103258
											9	0.0653696	0.0688385
											10	0.0308171	0.0413031
Poissonverteilung											11	0.0120067	0.022529
											12	0.00385928	0.0112645
	6										13	0.00101783	0.00519899
											14	0.000218107	0.00222814
											15	3.73898e-05	0.000891256
											16	5.00756e-06	0.000334221
											17	5.04964e-07	0.00011796
											18	3.60688e-08	3.93201e-05
											19	1.62717e-09	1.24169e-05
											20	3.48678e-11	3.72506e-06
