# Supplementary material
Source: publisher site journal article supplement (https://www.degruyterbrill.com/publication/isbn/9783486710663/downloadAsset/9783486710663_Anwendungen--de.zip)
Supplement: Supplementary file 81 [file A_2203_Approx_Binomial_Normalvert.xls]

## Sheet: Simulation
Approximation: Binomialverteilung an die Normalverteilung														0		Variante 1
Binomialverteilung										0	0.5	0.121577	0.0978869	1	2	Variante 2
										1	1.5	0.27017	0.225235	1	Standardabw.	Variante 3
n =	20									2	2.5	0.28518	0.297354		1.34164	Variante 4	20	20	20	20
										3	3.5	0.19012	0.225235				0.1	0.15	0.2	0.5
p =	0.1									4	4.5	0.0897788	0.0978869
										5	5.5	0.0319214	0.0244083
E(X) = n . p	2									6	6.5	0.00886704	0.00349202
										7	7.5	0.00197045	0.000286642
np >= 5 ? und	2									8	8.5	0.000355776	1.34999e-05
										9	9.5	5.27076e-05	3.6479e-07
n(1-p) >= 5 ?	18									10	10.5	6.44204e-06	5.65566e-09
										11	11.5	6.50711e-07	5.03093e-11
Normalverteilung										12	12.5	5.4226e-08	2.56766e-13
										13	13.5	3.70776e-09	7.51889e-16
E(X) =	2									14	14.5	2.05987e-10	1.26327e-18
										15	15.5	9.15496e-12	1.21776e-21
	1.34164									16	16.5	3.1788e-13	6.73522e-25
										17	17.5	8.3106e-15	2.13732e-28
										18	18.5	1.539e-16	3.89144e-32
										20	20.5	1e-20	2.43652e-40
