# Supplementary material
Source: publisher site journal article supplement (https://www.degruyterbrill.com/publication/isbn/9783486710663/downloadAsset/9783486710663_Anwendungen--de.zip)
Supplement: Supplementary file 82 [file A_2204_Approx_Poisson_Normalvert.xls]

## Sheet: Simulation
Approximation: Poissonverteilung an die Normalverteilung												Ps(l)	N(l;l)	Erwartungwert	Variante 1
										0	0.15	0.548812	0.435058	0.6	Variante 2
Poissonverteilung										1	1.15	0.329287	0.400273	Standardabw	Variante 3
										2	2.15	0.0987861	0.069557	0.774597	Variante 4
	0.6									3	3.15	0.0197572	0.00228298		Variante 5	0.6	1	3	7	10	15
										4	4.15	0.00296358	1.41526e-05		Variante 6
										5	5.15	0.00035563	1.6571e-08
										6	6.15	3.5563e-05	3.6647e-12
										7	7.15	3.04826e-06	1.53074e-16
										8	8.15	2.28619e-07	1.20765e-21
Normalverteilung										9	9.15	1.52413e-08	1.79952e-27
										10	10.15	9.14477e-10	5.06465e-34
E(X) =	0.6									11	11.15	4.98806e-11	2.69226e-41
										12	12.15	2.49403e-12	2.70309e-49
	0.774597									13	13.15	1.15109e-13	5.126e-58
										14	14.15	4.93324e-15	1.83601e-67
										15	15.15	1.9733e-16	1.24207e-77
										16	16.15	7.39986e-18	1.58705e-88
										17	17.15	2.61172e-19	3.83014e-100
										18	18.15	8.70572e-21	1.74587e-112
										19	19.15	2.74918e-22	1.5031e-125
										20	20.15	8.24753e-24	2.4442e-139
										21	21.15	2.35644e-25	7.50695e-154
										22	22.15	6.42664e-27	4.35477e-169
										23	23.15	1.67652e-28	4.77137e-185
										24	24.15	4.19129e-30	9.87408e-202
										25	25.15	1.00591e-31	3.85946e-219
										26	26.15	2.32133e-33	2.84926e-237
										27	27.15	5.15851e-35	3.97295e-256
										28	28.15	1.1054e-36	1.04633e-275
										29	29.15	2.28702e-38	5.20479e-296
										30	30.15	4.57405e-40	0
