# Supplementary material
Source: publisher site journal article supplement (https://www.degruyterbrill.com/publication/isbn/9783486710663/downloadAsset/9783486710663_Anwendungen--de.zip)
Supplement: Supplementary file 83 [file A_2205_Approx_t-Verteilung_Normalvert.xls]

## Sheet: Simulation
Approximation t-Verteilung an die Standardnormalverteilung											Frhgrd. M	3	Konstante	0.367553	Variante 1
											-4	0.00916336	-4	0.00013383	Variante 2
t-Verteilung											-3.8	0.010876	-3.8	0.000291947	Variante 3	3	10	30
											-3.6	0.0129866	-3.6	0.000611902
E(X) =	0										-3.4	0.0156041	-3.4	0.00123222
											-3.2	0.0188706	-3.2	0.00238409
V(X) =	3										-3	0.022972	-3	0.00443185
											-2.8	0.0281516	-2.7	0.00791545
Freiheitsgrade											-2.6	0.0347266	-2.6	0.013583
											-2.4	0.0431076	-2.4	0.0223945
n =	3										-2.2	0.0538183	-2.2	0.0354746
											-2	0.0675097	-2	0.053991
											-1.8	0.0849558	-1.8	0.0789502
											-1.6	0.107007	-1.6	0.110921
											-1.4	0.134462	-1.4	0.149727
											-1.2	0.167802	-1.2	0.194186
											-1	0.206748	-1	0.241971
											-0.8	0.249666	-0.8	0.289692
											-0.6	0.293011	-0.6	0.333225
											-0.4	0.331274	-0.4	0.36827
											-0.2	0.357944	-0.2	0.391043
											-1.06581e-14	0.367553	-1.06581e-14	0.398942
											0.2	0.357944	0.2	0.391043
											0.4	0.331274	0.4	0.36827
											0.6	0.293011	0.6	0.333225
											0.8	0.249666	0.8	0.289692
											1	0.206748	1	0.241971
											1.2	0.167802	1.2	0.194186
											1.4	0.134462	1.4	0.149727
											1.6	0.107007	1.6	0.110921
											1.8	0.0849558	1.8	0.0789502
											2	0.0675097	2	0.053991
											2.2	0.0538183	2.2	0.0354746
											2.4	0.0431076	2.4	0.0223945
											2.6	0.0347266	2.6	0.013583
											2.8	0.0281516	2.8	0.00791545
											3	0.022972	3	0.00443185
											3.2	0.0188706	3.2	0.00238409
											3.4	0.0156041	3.4	0.00123222
											3.6	0.0129866	3.6	0.000611902
											3.8	0.010876	3.8	0.000291947
											4	0.00916336	4	0.00013383
