# Supplementary material
Source: publisher site journal article supplement (https://www.degruyterbrill.com/publication/isbn/9783486710663/downloadAsset/9783486710663_Anwendungen--de.zip)
Supplement: Supplementary file 84 [file A_2206_Zentraler_Grenzwertsatz.xls]

## Sheet: Simulation1
Zentraler Grenzwertsatz: 2-maliger Würfelwurf
Grund-	Zufalls-	Stichproben-	Absolute	Relative														50
gesamtheit	stichprobe	Mittelwert	Häufigkeit	Häufigkeit														100
"Würfel"	n = 2	1											2		1	0.0387555	0.0193777	200
1		1.5											5		1.5	0.083824	0.041912	300
2		2													2	0.15274	0.0763698	400
3		2.5													2.5	0.234467	0.117234	500
4		3													3	0.303222	0.151611	1000
5		3.5													3.5	0.33036	0.16518	2000
6		4													4	0.303222	0.151611	3000
	Stichproben-	4.5													4.5	0.234467	0.117234
	Mittelwert	5													5	0.15274	0.0763698
		5.5													5.5	0.083824	0.041912
		6													6	0.0387555	0.0193777
	Anzahl	Summe
	Experimente
						Ziehung			Anzahl:
						der
						Zufalls-		=>	1 Stichpr.
						Stichproben

## Sheet: Simulation2
Zentraler Grenzwertsatz: 4-maliger Würfelwurf															1	0	0.00642963	0.00160741
Grund-	Zufalls-	Stichproben-	Absolute	Relative											1.25	0	0.0145156	0.00362891	50
gesamtheit	stichprobe	Mittelwert	Häufigkeit	Häufigkeit											1.5	0	0.0300788	0.0075197	100
"Würfel"	n = 4	1											5	5	1.75	0	0.0572081	0.014302	200
1		1.25											3		2	0	0.0998686	0.0249672	300
2		1.5											3		2.25	0	0.16002	0.040005	400
3		1.75											5		2.5	0	0.235338	0.0588345	500
4		2													2.75	0	0.317676	0.079419	1000
5		2.25													3	0	0.393596	0.0983989	2000
6		2.5													3.25	0	0.4476	0.1119	3000
	Stichproben-	2.75													3.5	0	0.4672	0.1168
	Mittelwert	3													3.75	0	0.4476	0.1119
		3.25													4	0	0.393596	0.0983989
		3.5													4.25	0	0.317676	0.079419
	Anzahl	3.75													4.5	0	0.235338	0.0588345
	Experimente	4													4.75	0	0.16002	0.040005
		4.25													5	0	0.0998686	0.0249672
		4.5													5.25	0	0.0572081	0.014302
		4.75													5.5	0	0.0300788	0.0075197
		5				Ziehung			Anzahl:						5.75	0	0.0145156	0.00362891
		5.25				der									6	0	0.00642963	0.00160741
		5.5				Zufalls-		=>	1 Stichpr.
		5.75				Stichproben
		6

## Sheet: Simulation3
Zentraler Grenzwertsatz: 20-maliger Würfelwurf
Grund-	Zufalls-	Stichproben-	Absolute	Relative															50
gesamtheit	stichprobe	Mittelwert	Häufigkeit	Häufigkeit															100
"Würfel"	n = 20	1,00 - 1,74																	200
1													3		1.5		1.15746e-06	5.78728e-07	300
2		1,75 - 2,24											6		2		0.000466677	0.000233339	400
3													1		2.5		0.0338919	0.016946	500
4		2,25 - 2,74											6		3		0.443348	0.221674	1000
5													6		3.5		1.04462	0.522312	2000
6		2,75 - 3,24											3		4		0.443348	0.221674	3000
													1		4.5		0.0338919	0.016946
		3,25 - 3,74											1		5		0.000466677	0.000233339
													5		5.5		1.15746e-06	5.78728e-07
		3,75 - 4,24											6
Stichproben-													6
Mittelwert		4,25 - 4,74											6
3.05													1
		4,75 - 5,24											6
													5
Anzahl		5,25 - 6,00				Ziehung			Anzahl:				2
Experimente						der							1
		Summe				Zufalls-		=>	1 Stichpr.				1
						Stichproben							2
													4

## Sheet: Simulation4
Zentraler Grenzwertsatz: 2-maliges Ziehen aus "Glockenkurve"																		Mittelwert	3.5	Stabw	1.38444
Grundges.	Zufalls-	Stichproben-	Absolute	Relative														Stichproben-			50
"Glocken-	stichprobe	Mittelwert	Häufigkeit	Häufigkeit														Mittelwert			100
kurve"	n = 2	1									Grundges.	Auswahl		Stichprobe	Stichproben-			1	0.0156305	0.00781527	200
1		1.5									"Glk-Kurve"		0-1	n = 2	Mittelwert			1.5	0.050559	0.0252795	300
2		2									1			8				2	0.125988	0.0629938	400
2		2.5									2			8				2.5	0.24186	0.12093	500
3		3									2							3	0.357688	0.178844	1000
3		3.5									3			10				3.5	0.407523	0.203761	2000
3		4									3			12				4	0.357688	0.178844	3000
4		4.5									3							4.5	0.24186	0.12093
4		5									4							5	0.125988	0.0629938
4		5.5									4	4						5.5	0.050559	0.0252795
5		6									4							6	0.0156305	0.00781527
5		Summe									5							Summe
6											5
	Stichproben-										6
	Mittelwert											4
						Ziehung			Anzahl:
	Anzahl					der
	Experimente					Zufalls-		=>	1 Stichpr.
						Stichproben

## Sheet: Simulation5
Zentraler Grenzwertsatz: 2-maliges Ziehen aus linkssteiler Verteilung																		Mittelwert	2.58333	Stabw	1.60511
Grundges.	Zufalls-	Stichproben-	Absolute	Relative														Stichproben-			50
"links-	stichprobe	Mittelwert	Häufigkeit	Häufigkeit														Mittelwert			100
steil"	n = 2	1									Grundges.	Auswahl		Stichprobe	Stichproben-			1	0.132841	0.0664203	200
1		1.5									"Glk-Kurve"		0-1	n = 2	Mittelwert			1.5	0.222888	0.111444	300
1		2									1			9				2	0.308006	0.154003	400
1		2.5									1			7				2.5	0.350549	0.175275	500
1		3									1							3	0.32859	0.164295	1000
2		3.5									1			2				3.5	0.253674	0.126837	2000
2		4									2			10				4	0.161293	0.0806463	3000
2		4.5									2							4.5	0.0844635	0.0422318
3		5									2	4						5	0.0364284	0.0182142
3		5.5									3							5.5	0.0129398	0.00646991
4		6									3	4						6	0.00378558	0.00189279
5		Summe									4							Summe
6											5
	Stichproben-										6
	Mittelwert											8
						Ziehung			Anzahl:
	Anzahl					der
	Experimente					Zufalls-		=>	1 Stichpr.
						Stichproben

## Sheet: Simulation6
Zentraler Grenzwertsatz: 4-maliges Ziehen aus linkssteiler Verteilung																		Mittelwert	2.58333	Stabw.	1.60511
Grundges.	Zufalls-	Stichproben-	Absolute	Relative														Stichproben-			50
"links-	stichprobe	Mittelwert	Häufigkeit	Häufigkeit														Mittelwert			100
steil"	n = 4	1									Grundges.	Auswahl		Stichprobe	Stichproben-			1	0.0709999	0.01775	200
1		1.25									"Glk-Kurve"		0-1	n = 4	Mittelwert			1.25	0.12505	0.0312626	300
1		1.5									1			10				1.5	0.19988	0.0499701	400
1		1.75									1			7				1.75	0.289943	0.0724859	500
1		2									1			12				2	0.381694	0.0954234	1000
2		2.25									1			4				2.25	0.456011	0.114003	2000
2		2.5									2			3				2.5	0.494417	0.123604	3000
2		2.75									2			1				2.75	0.486485	0.121621
3		3									2	4		12				3	0.434414	0.108604
3		3.25									3			1				3.25	0.352044	0.088011
4		3.5									3							3.5	0.258909	0.0647274
5		3.75									4	5						3.75	0.172805	0.0432013
6		4									5							4	0.104671	0.0261676
	Stichproben-	4.25									6							4.25	0.0575374	0.0143844
	Mittelwert	4.5										9						4.5	0.0287035	0.00717586
		4.75																4.75	0.012995	0.00324875
		5				Ziehung			Anzahl:									5	0.00533921	0.0013348
	Anzahl	5.25				der												5.25	0.00199083	0.000497709
	Experimente	5.5				Zufalls-		=>	1 Stichpr.									5.5	0.000673677	0.000168419
		5.75				Stichproben												5.75	0.000206884	5.1721e-05
		6																6	5.76581e-05	1.44145e-05
