# Supplementary material
Source: publisher site journal article supplement (https://www.degruyterbrill.com/publication/isbn/9783486710663/downloadAsset/9783486710663_Anwendungen--de.zip)
Supplement: Supplementary file 85 [file A_2207_Grenzwertsatz_DeMoivre_LaPlace.xls]

## Sheet: Simulation
Grenzwertsatz von DeMoivre-Laplace												B(n;p)	N(m;s)	1	Erwartungswert
Normalverteilung										0	0.5	0.348678	0.241276	1	1
										1	1.5	0.38742	0.420522	0	Standardabw.
E(X) =	1									2	2.5	0.19371	0.241276		0.948683
										3	3.5	0.0573956	0.0455711
	0.948683									4	4.5	0.0111603	0.00283346		p	0.1
										5	5.5	0.00148803	5.79954e-05		p = 0,10	0.1
Binomialverteilung										6	6.5	0.000137781	3.9077e-07		p = 0,20	0.2
										7	7.5	8.748e-06	8.66761e-10		p = 0,30	0.3
E(X) = n . p >= 5?	1									8	8.5	3.645e-07	6.3289e-13		p = 0,40	0.4
										9	9.5	9e-09	1.52127e-16		p = 0,50	0.5
und: n(1-p) >= 5?	9									10	10.5	1e-10	1.20375e-20
										11	11.5	#NUM!	3.13558e-25
p =	0.1									12	12.5	#NUM!	2.68874e-30
										13	13.5	#NUM!	7.5898e-36
n =	10									14	14.5	#NUM!	7.05281e-42
										15	15.5	#NUM!	2.15747e-48
										16	16.5	#NUM!	2.17259e-55
										17	17.5	#NUM!	7.20216e-63
										18	18.5	#NUM!	7.85954e-71
										19	19.5	#NUM!	2.82346e-79
										20	20.5	#NUM!	3.33901e-88
