# Supplementary material
Source: publisher site journal article supplement (https://www.degruyterbrill.com/publication/isbn/9783486710663/downloadAsset/9783486710663_Anwendungen--de.zip)
Supplement: Supplementary file 86 [file A_2301_Punktschtzung_Mittelwert.xls]

## Sheet: Simulation
Punktschätzung Mittelwert: Zufallsstichprobe											29.2776	0.5
Zufalls-											93.0018	0.5
variable X
n = 16
78.9	Stichprobenmittel										1
9.41429	61.1397										1
91.6049											1
35.9829	Stichprobenvarianz										1
76.5915	1015.19										1
16.2036											1
98.0115	Stichpr.Standardabw.										1
10.5255	31.8621										1
56.9121											1
76.4948											1
73.1081											1
25.9013											1
83.741											1
92.352											1
54.8379											1
97.6535											1
											1
											1
											1
											1
