# Supplementary material
Source: publisher site journal article supplement (https://www.degruyterbrill.com/publication/isbn/9783486710663/downloadAsset/9783486710663_Anwendungen--de.zip)
Supplement: Supplementary file 87 [file A_2302_Punktschtzung_Anteilswert.xls]

## Sheet: Simulation
Punktschätzung Anteilswert: Zufallsstichprobe											-0.0748475	0.5
Zufalls-											0.949848	0.5
variable X
n = 16
1	Stichprobenmittel										1	0	9
1	0.4375										1	1	7
0											1
1	Stichprobenvarianz										1
1	0.2625										1
0											1
1	Stichpr.Standardabw.										1
0	0.512348										1
1											1
0											1
0											1
1											1
0											1
0											1
0											1
0											1
											1
											1
											1
											1
