# Supplementary material
Source: publisher site journal article supplement (https://www.degruyterbrill.com/publication/isbn/9783486710663/downloadAsset/9783486710663_Anwendungen--de.zip)
Supplement: Supplementary file 88 [file A_2303_Punktschtzung_Erwartungstreue.xls]

## Sheet: Simulation1
Erwartungstreue: 2-maliger Würfelwurf
Grund-	Stichproben-	Stichproben-	Absolute	Relative															50
gesamtheit	Mittelwert	Mittelwert	Häufigkeit	Häufigkeit															100
"Würfel"	(n = 2)	1											3		1	0.0387552	0.0193776		200
1		1.5											4		1.5	0.0838237	0.0419118		300
2		2													2	0.152739	0.0763697		400
3	Anzahl	2.5													2.5	0.234468	0.117234		500
4	Experimente	3													3	0.303223	0.151611		1000
5		3.5													3.5	0.33036	0.16518		2000
6		4													4	0.303223	0.151611		3000
		4.5													4.5	0.234468	0.117234
		5													5	0.152739	0.0763697
		5.5													5.5	0.0838237	0.0419118
Erwartungs-	Mittelwert	6													6	0.0387552	0.0193776
wert des	aller	Summe													Summe
Würfels	Stpr-Mittel
3.5
Varianz	Varianz					Ziehung		=>	Anzahl:							6	0
des	aller					der
Würfels	Stpr-Mittel					Zufalls-		=>	1 Stichpr.
2.91667	1.45833					Stichproben

## Sheet: Simulation2
Erwartungstreue: 4-maliger Würfelwurf
Grund-	Stichproben-	Stichproben-	Absolute	Relative																50
gesamtheit	Mittelwert	Mittelwert	Häufigkeit	Häufigkeit																100
"Würfel"	(n = 4)	< 1,25											5	5	1		0.00642963	0.00321482		200
1													3		1.5		0.0300788	0.0150394	3	300
2		1,25 - 1,75											3		2		0.0998686	0.0499343	6	400
3	Anzahl												1		2.5		0.235338	0.117669	5	500
4	Experimente	1,75 - 2,25													3		0.393596	0.196798	2	1000
5															3.5		0.4672	0.2336		2000
6		2,25 - 2,75													4		0.393596	0.196798		3000
															4.5		0.235338	0.117669
		2,75 - 3,25													5		0.0998686	0.0499343
															5.5		0.0300788	0.0150394
Erwartungs-	Mittelwert	3,25 - 3,75													6		0.00642963	0.00321482
wert des	aller
Würfels	Stpr-Mittel	3,75 - 4,25
3.5
		4,25 - 4,75
Varianz	Varianz	4,75 - 5,25				Ziehung		=>	Anzahl:										6	0
des	aller					der
Würfels	Stpr-Mittel	5,25 - 5,75				Zufalls-		=>	1 Stichpr.
2.91667	0.729167					Stichproben
		> 5,75

## Sheet: Simulation3
Erwartungstreue: 20-maliger Würfelwurf
Grund-	Stichproben-	Stichproben-	Absolute	Relative																50
gesamtheit	Mittelwert	Mittelwert	Häufigkeit	Häufigkeit																100
"Würfel"	(n = 20)	< 1,25																		200
1													3		1			5.17084e-10	2.58542e-10	300
2		1,25 - 1,75											6		1.5			1.15746e-06	5.78728e-07	400
3	Anzahl												3		2			0.000466677	0.000233339	500
4	Experimente	1,75 - 2,25											4		2.5			0.0338919	0.016946	1000
5													4		3			0.443348	0.221674	2000
6		2,25 - 2,75											4		3.5			1.04462	0.522312	3000
													6		4			0.443348	0.221674
		2,75 - 3,25											4		4.5			0.0338919	0.016946
													2		5			0.000466677	0.000233339
Erwartungs-	Mittelwert	3,25 - 3,75											3		5.5			1.15746e-06	5.78728e-07
wert des	aller												2		6			5.17084e-10	2.58542e-10
Würfels	Stpr-Mittel	3,75 - 4,25											2
3.5													5
		4,25 - 4,75											5				6.325
													5				#VALUE!
Varianz	Varianz	4,75 - 5,25				Ziehung		=>	Anzahl:				1
des	aller					der							2		6	0
Würfels	Stpr-Mittel	5,25 - 5,75				Zufalls-		=>	1 Stichpr.				2
2.91667	0.145833					Stichproben							4
		> 5,75											2
