# Supplementary material
Source: publisher site journal article supplement (https://www.degruyterbrill.com/publication/isbn/9783486710663/downloadAsset/9783486710663_Anwendungen--de.zip)
Supplement: Supplementary file 89 [file A_2401_Intervallschtzung_Grundlagen.xls]

## Sheet: Simulation
Intervallschätzung: Grundlagen												120	4.75194e-13					Variante 1
												125	6.0516e-11					Variante 2
Normalverteilung												130	4.6269e-09				0.15865	Variante 3
												135	2.12389e-07					Variante 4	Var 1	Var 2	Var 3
Erwartungswert		170										140	5.8532e-06	163	0			Variante 5	170	170	170
Standardabw.		7										145	9.68449e-05	163	0.0345665	0.15865	0.84135	Variante 6	7	7	7
												150	0.000962014						68.27	90	95
Intervall für die												150	0.000962014	177	0				Var 4	Var 5	Var 6
												155	0.0057373	177	0.0345665	0.84135	163	177	160	160	160
Wahrscheinlichkeit												157	0.0101596				0	0	10	10	10
												160	0.0205426						68.27	90	95
P (in %) =		68.27										160	0.0205426	163	0
												163	0.0345672
Untergrenze		163										165	0.0441593	177	0
												170	0.0569918
Obergrenze		177										175	0.0441593
												180	0.0205426
												185	0.0057373
												190	0.000962014
												195	9.68449e-05
												200	5.8532e-06
												205	2.12389e-07
												210	4.6269e-09
												220	4.75194e-13
