# Supplementary material
Source: publisher site journal article supplement (https://www.degruyterbrill.com/publication/isbn/9783486710663/downloadAsset/9783486710663_Anwendungen--de.zip)
Supplement: Supplementary file 90 [file A_2402_Intervallschtzung_Sicherheitsgrad.xls]

## Sheet: Simulation
Konfidenzintervalle: Sicherheitsgrad													28.8675
Zufalls-											0.95	1.64485	35
Stichprobe													15
X	Stichproben- umfang	n	35		56.1429	Mittelwert der	Grund- gesamtheit	50			0	0
90	Sicherheits- grad		0.9		28.8675
61											1
31	Konfidenzintervall
1
86				56.1429	1.64485	28.8675
97			=
29						5.91608
23
90
74		Untergrenze	48.1168	Obergrenze	64.1689		Versuche
100							Treffer
1							Anteil
83
51
91
81
18
100
52
37
56
23
73
56
37
86
27
2
52
41
43
72
67
87
47
