# Supplementary material
Source: publisher site journal article supplement (https://www.degruyterbrill.com/publication/isbn/9783486710663/downloadAsset/9783486710663_Anwendungen--de.zip)
Supplement: Supplementary file 91 [file A_2403_Konfidenzintervalle_Mittelwert.xls]

## Sheet: Simulation1
Konfidenzintervall: Normalverteilung, bekannte Varianz													Variante 1	n	16	xq	28.75
Stichprobe											0.975	1.95996	Variante 2	sgr	0.95	s	6
X		n	16		28.75								Variante 3	n	25	xq	28.75	X	X	X
28			0.95		6						0	0		sgr	0.999	s	6	28	28	28
33														n	25	xq	28.75	33	33	33
26	Konfidenzintervall													sgr	0.999	s	6	26	26	26
27																		27	27	27
29			28.75		1.95996	6												29	29	29
27		=																27	27	27
24						4												24	24	24
28																		28	28	28
30																		30	30	30
29		Untergrenze	25.8101		Obergrenze	31.6899												29	29	29
29																		29	29	29
32																		32	32
35																		35	35
26																		26	26
31																		31	31
26																		26	26

## Sheet: Simulation2
Konfidenzintervall: Normalverteilung, unbekannte Varianz											Umrechng.		Variante 1	n	16	xq	28.75
Stichprobe											0.975	2.13145	Variante 2	sgr	0.95	s	6
X		n	16		31.6875						KI-Y-Achse		Variante 3	n	25	xq	28.75	X	X	X
28			0.95	s	10.7686						0	0		sgr	0.99	s	6	28	28	28
18														n	25	xq	28.75	18	18	18
26	Konfidenzintervall													sgr	0.99	s	6	26	26	26
47																		47	47	47
29			31.6875		2.13145	10.7686												29	29	29
27		=																27	27	27
21						4												21	21	21
28																		28	28	28
43																		43	43	43
29		Untergrenze	25.9493		Obergrenze	37.4257												29	29	29
17																		17	17	17
32																		32	32	32
35																		35	35
26																		26	26
53																		53	53
48																		48	48

## Sheet: Simulation3
Konfidenzintervall: Unbekannte Verteilung, große Stichprobe													Variante 1	n	16	xq	28.75
Stichprobe											0.975	1.95996	Variante 2	sgr	0.95	s	6
X		n	30		31.6								Variante 3	n	25	xq	28.75	X	X	X
28			0.95	s	10.2809						0	0		sgr	0.99	s	6	28	28	28
18														n	25	xq	28.75	18	18	18
26	Konfidenzintervall													sgr	0.99	s	6	26	26	26
47																		47	47	47
29			31.6		1.95996	10.2809												29	29	29
27		=																27	27	27
21						5.47723												21	21	21
28																		28	28	28
43																		43	43	43
29		Untergrenze	27.9211		Obergrenze	35.2789												29	29	29
17																		17	17	17
32																		32	32	32
35																		35	35	35
26																		26	26	26
53																		53	53	53
48																		48	48	48
29																		29	29	29
27																		27	27	27
21																		21	21	21
28																		28	28	28
43																		43	43	43
29																		29	29	29
17																		17	17	17
32																		32	32	32
35																		35	35	35
26																		26	26	26
53																		53	53	53
48																		48	48	48
26																		26	26	26
27																		27	27	27
																				32
																				35
																				26
																				53
																				48
																				29
																				27
																				21
																				28
																				43
																				29
																				17
																				32
																				35
																				26
																				53
																				48
																				26
																				27
																				48
