# Supplementary material
Source: publisher site journal article supplement (https://www.degruyterbrill.com/publication/isbn/9783486710663/downloadAsset/9783486710663_Anwendungen--de.zip)
Supplement: Supplementary file 92 [file A_2404_Konfidenzintervalle_Anteilswert.xls]

## Sheet: Simulation
Konfidenzintervall: Anteilswert											Umrechng.		Variante 1	100	0.5	0.95
											0.975	1.95996	Variante 2	100	0.5	0.9
		n	100		0.5						KI-Y-Achse		Variante 3	50	0.5	0.9
			0.95								0	0	Variante 4	100	0.2	0.95
													Variante 5	100	0.2	0.9
	Konfidenzintervall												Variante 6	50	0.2	0.9
													50	0
				0.5	1.95996	0.5							50	Achtung: Normalverteilung???
			=
						9.94987
		Untergrenze	0.401508	Obergrenze	0.598492
