# Supplementary material
Source: publisher site journal article supplement (https://www.degruyterbrill.com/publication/isbn/9783486710663/downloadAsset/9783486710663_Anwendungen--de.zip)
Supplement: Supplementary file 93 [file A_2405_Notwendiger_Stichprobenumfang.xls]

## Sheet: Simulation1
Notwendiger Stichprobenumfang: Mittelwert (bei Normalverteilung; m.Z.)													Variante 1	0.9	10	5	100
											0.95	1.64485	Variante 2	0.9	10	3	100
		0.9		10	e	5	Annahme:	100					Variante 3	0.95	10	3	100
							Mittelwert				0	0	Variante 4	0.99	10	3	100
													Variante 5	0.99	20	3	100
													Variante 6	0.99	20	2	100
					2.70554	100
				=			=	11
					25
			K-Intervall-	95	K-Intervall-	105
			Untergrenze		Obergrenze

## Sheet: Simulation2
Notwendiger Stichprobenumfang: Anteilswert (m.Z.)													Variante 1	0.9		0.06	0.6
											0.95	1.64485	Variante 2	0.9		0.05	0.6
		0.9	p(1-p)	0.489898	e	0.06	Anteilswert	0.6					Variante 3	0.95		0.05	0.6
							p				0	0	Variante 4	0.99		0.05	0.6
													Variante 5	0.99		0.05	0.5
													Variante 6	0.99		0.03	0.5
					2.70554	0.24
				=			=	181
					0.0036
			K-Intervall-	0.54	K-Intervall-	0.66
			Untergrenze		Obergrenze
