# Supplementary material
Source: publisher site journal article supplement (https://www.degruyterbrill.com/publication/isbn/9783486710663/downloadAsset/9783486710663_Anwendungen--de.zip)
Supplement: Supplementary file 94 [file A_2501_Hypothesentest_Grundlagen.xls]

## Sheet: Simulation
Signifikanztest: zweiseitig																		Variante 1
Nullhypothese												140	2.40437e-16	162.843	0			Variante 2
Erwartungswert		170										142	1.86287e-14	162.843	0.0160059	0.360232	0.00025	Variante 3			175	175	175
												145	7.23875e-12
Signifikanzniveau		0.05										147	2.64926e-10	177.157	0						0.05	0.1	0.1
												150	3.34213e-08	177.157	0.0160059	0.639768	0.99975
Standardabweichung		20										152	5.7778e-07								20	20	20
												155	2.36636e-05	140	0
Stichprobenumfang n		30										157	0.000193241	162.843	0		190				30	30	50
												160	0.00256943
Ablehnungsbereich												162	0.00991138	177.157	0
												165	0.0427848	200	0
unterer kritischer Wert		162.843										167	0.077959
oberer kritischer Wert		177.157										170	0.109255
Stichprobenmittel		190										172	0.0940365								190	180	180
												175	0.0427848
=> Nullhypothese		ablehnen										177	0.017395
												180	0.00256943
												182	0.000493458
												185	2.36636e-05
												187	2.14671e-06
												190	3.34213e-08
												192	1.43217e-09
												195	7.23875e-12
												197	1.46526e-13
												200	2.40437e-16
