# Supplementary material
Source: publisher site journal article supplement (https://www.degruyterbrill.com/publication/isbn/9783486710663/downloadAsset/9783486710663_Anwendungen--de.zip)
Supplement: Supplementary file 95 [file A_2502_Hypothesentest_Signifikanzniveau.xls]

## Sheet: Simulation
Hypothesentests: Signifikanzniveau
Zufalls-												1.64485
Stichprobe X	Nullhypothese	Mittelwert =	50	n	35		52.6				KI-Y-Achse
33	Signifikanzniveau		0.1				28.8675				0	0
18												ablehnen	nicht ablehnen
83	Ablehnungsbereich										0
73							Versuche
23			50	1.64485	28.8675		Ablehnung
18		=					Anteil
76					5.91608
69
81
40		Untergrenze	41.9739	Obergrenze	58.0261		Null-	nicht ablehnen			-10	120
33							hypothese
91
75
81
81
90
51
40
4
15
58
34
97
18
33
23
49
68
46
45
83
69
13
79
51
