# Supplementary material
Source: publisher site journal article supplement (https://www.degruyterbrill.com/publication/isbn/9783486710663/downloadAsset/9783486710663_Anwendungen--de.zip)
Supplement: Supplementary file 96 [file A_2503_Hypothesentest_Fehler_1.+2.Art.xls]

## Sheet: Simulation
Hypothesentest (Fehler 1. Art und Fehler 2. Art)																			Variante 1
Nullhypothese												142	1.61381e-20					1.92185e-36	Variante 2
Erwartungswert		170										144	6.51056e-18			0	0.01	7.15461e-33	Variante 3			170	170	170
												146	1.68409e-15					1.70778e-29
Standardabw.		15										148	2.79314e-13	176.979	0			2.61372e-26				15	15	15
												150	2.9703e-11	176.979	0.080093	0.99	0.99	2.56487e-23									90
Alternativhypothese												152	2.02529e-09					1.61381e-20
Erwartungswert		180										154	8.85434e-08	140	0		0.00888417	6.51056e-18				180	180	180			0
												156	2.48202e-06	0	0		0.080093	1.68409e-15
Standardabw.		15										158	4.46101e-05					2.79314e-13				15	15	15			176.979
												160	0.000514093	176.979	0		Beta-Fehler	2.9703e-11
Fehler 1. Art		0.01										162	0.00379866	250	0		0.156969	2.02529e-09				0.01	0.05	0.1
												164	0.017997					8.85434e-08
(Alpha-Fehler)												166	0.05467					2.48202e-06
Fehler 2. Art		0.156969										168	0.106483					4.46101e-05				0
												170	0.132981					0.000514093
(Beta-Fehler)												172	0.106483					0.00379866
												174	0.05467					0.017997
												176	0.017997					0.05467
												178	0.00379866					0.106483
												180	0.000514093					0.132981
												182	4.46101e-05					0.106483
												184	2.48202e-06					0.05467
												186	8.85434e-08					0.017997
												188	2.02529e-09					0.00379866
												190	2.9703e-11					0.000514093
												192	2.79314e-13					4.46101e-05
												194	1.68409e-15					2.48202e-06
												196	6.51056e-18					8.85434e-08
												198	1.61381e-20					2.02529e-09
												200	2.56487e-23					2.9703e-11
												202	2.61372e-26					2.79314e-13
												204	1.70778e-29					1.68409e-15
												206	7.15461e-33					6.51056e-18
												208	1.92185e-36					1.61381e-20
												210	3.31005e-40					2.56487e-23
												212	3.65536e-44					2.61372e-26
												214	2.58824e-48					1.70778e-29
												216	1.17506e-52					7.15461e-33
												218	3.42054e-57					1.92185e-36
												220	6.38426e-62					3.31005e-40
