# Supplementary material
Source: publisher site journal article supplement (https://www.degruyterbrill.com/publication/isbn/9783486710663/downloadAsset/9783486710663_Anwendungen--de.zip)
Supplement: Supplementary file 97 [file A_2601_Mittelwert-Tests_zweiseitig.xls]

## Sheet: Simulation1
Hypothesentest: Normalverteilung, bekannte Varianz											Umrechng.			Variante 1
Stichprobe												1.64485		Variante 2	Stichprobe	Stichprobe	Stichprobe	H0:	Mittelwert =	50
X	H0:	Mittelwert =	50	n	16		46.625				KI-Y-Achse			Variante 3	X	X	X	Signifikanzniveau		0.1
47	Signifikanzniveau		0.1				8				0	0			47	47	57			8
41												ablehnen	nicht ablehnen		41	41	56	H0:	Mittelwert =	50
51	Grenzen des Ablehnungsbereichs					Testgröße					1				51	51	62	Signifikanzniveau		0.05
42															42	42	42			8
49					8						Normvert				49	49	49	H0:	Mittelwert =	50
57			50	1.64485				-1.6875							57	57	57	Signifikanzniveau		0.01
37					4						0.0457536				37	37	37			8
34															34	34	34
69						Signifikanz-Wahrsch.		0.0457536							69	69	69
28	=>	Kritischer Wert unten	46.7103	Kritischer Wert oben	53.2897						-10	120			28	28	28
55						Signifikanzniveau / 2		0.05							55	55	55
29															29	29	29
33															33	33	33
47						Nullhypothese		ablehnen							47	47	47
58															58
69															69

## Sheet: Simulation2
Hypothesentest: Normalverteilung, unbekannte Varianz (t-Test)											Umrechng.			Variante 1
Stichprobe												1.67655		Variante 2	Stichprobe	Stichprobe	Stichprobe	H0:	Mittelwert =	50
X	H0:	Mittelwert =	50	n	16		46.625				KI-Y-Achse			Variante 3	X	X	X	Signifikanzniveau		0.1
47	Signifikanzniveau		0.1			s	12.8627				0	0		50	47	47	47			8
41												ablehnen	nicht ablehnen	50	41	41	41	H0:	Mittelwert =	50
51	Grenzen des Ablehnungsbereichs					Testgröße					0			50	51	51	41	Signifikanzniveau		0.05
42														50	42	42	42			8
49					12.8627									50	49	49	49	H0:	Mittelwert =	50
57			50	1.67655				-1.04954						50	57	57	32	Signifikanzniveau		0.01
37					4									50	37	37	37			8
34														50	34	34	34
69						Signifikanz-Wahrsch.		0.310545			0.310545			50	69	69	24
28	=>	Kritischer Wert unten	44.6087	Kritischer Wert oben	55.3913						-10	120		50	28	28	28
55						Signifikanzniveau / 2		0.05						50	55	55	55
29														50	29	29	29
33														50	33	33	33
47						Nullhypothese		nicht ablehnen						50	47	47	47
58														50	58
69														50	69

## Sheet: Simulation3
Hypothesentest: Unbekannte Verteilung, große Stichprobe											Umrechng.			Variante 1
Stichprobe												1.64485		Variante 2	Stichprobe	Stichprobe	Stichprobe	H0:	Mittelwert =	50
X	H0:	Mittelwert =	50	n	32		54.8438				KI-Y-Achse			Variante 3	X	X	X	Signifikanzniveau		0.1
67	Signifikanzniveau		0.1			s	11.9004				0	0			67	67	67			8
72												ablehnen	nicht ablehnen		72	72	72	H0:	Mittelwert =	50
51	Grenzen des Ablehnungsbereichs					Testgröße					1				51	51	51	Signifikanzniveau		0.05
42															42	42	42			8
49					11.9004										49	49	49	H0:	Mittelwert =	50
57			50	1.64485				2.30247							57	57	57	Signifikanzniveau		0.01
62					5.65685										62	62	62			8
34															34	34	34
69						Signifikanz-Wahrsch.		0.0106542							69	69	69
63	=>	Kritischer Wert unten	46.5397	Kritischer Wert oben	53.4603						-10	120			63	63	63
55						Signifikanzniveau / 2		0.05							55	55	55
58															58	58	58
39															39	39	39
47						Nullhypothese		ablehnen							47	47	47
58															58	58	58
69															69	69	69
47															47	47	47
67															67	67	67
51															51	51	51
42															42	42	42
49															49	49	49
57															57	57	57
37															37	37	37
34															34	34	34
69															69	69	69
74															74	74	74
55															55	55	55
68															68	68	68
39															39	39	39
47															47	47	47
58															58	58	58
69															69	69	69
