# Supplementary material
Source: publisher site journal article supplement (https://www.degruyterbrill.com/publication/isbn/9783486710663/downloadAsset/9783486710663_Anwendungen--de.zip)
Supplement: Supplementary file 98 [file A_2602_Mittelwert-Tests_einseitig.xls]

## Sheet: Simulation1
Hypothesentest: Normalverteilung, bekannte Varianz											Umrechng.			Variante 1
Stichprobe												1.28155		Variante 2	Stichprobe	Stichprobe	Stichprobe	H0:	Mittelwert =	50
X	H0:	Mittelwert	50	n	16		56.25				KI-Y-Achse			Variante 3	X	X	X	Signifikanzniveau		0.1
62	Signifikanzniveau		0.1				8				0	0			62	62	62			8
58												ablehnen	nicht ablehnen		58	58	58	H0:	Mittelwert =	50
52	Grenze des Ablehnungsbereichs					Testgröße					1				52	52	52	Signifikanzniveau		0.05
32															32	32	32			8
67			50	1.28155	8										67	67	67	H0:	Mittelwert =	50
23		=						3.125							23	23	23	Signifikanzniveau		0.01
29					4						0.000889093				29	29	29			8
73															73	73	73
55						Signifikanz-Wahrsch.		0.000889093							55	55	55
59		=>	Kritischer	52.5631							120				59	59	59
71			Wert			Signifikanzniveau		0.1							71	71	71
52															52	52	52
55															55	55	55
63						Nullhypothese		ablehnen							63	63	63
78															78	78	78
71															71	71	71

## Sheet: Simulation2
Hypothesentest: Normalverteilung, unbekannte Varianz (t-Test)											Umrechng.			Variante 1
Stichprobe												1.34061		Variante 2	Stichprobe	Stichprobe	Stichprobe	H0:	Mittelwert =	50
X	H0:	Mittelwert	50	n	16		56.25				KI-Y-Achse			Variante 3	X	X	X	Signifikanzniveau		0.1
62	Signifikanzniveau		0.1			s	16.0603				0	0		50	62	62	62			8
58												ablehnen	nicht ablehnen	50	58	58	58	H0:	Mittelwert =	50
52	Grenze des Ablehnungsbereichs					Testgröße					1			50	52	52	52	Signifikanzniveau		0.05
32														50	32	32	32			8
67			50	1.34061	16.0603									50	67	67	67	H0:	Mittelwert =	50
23		=						1.55663						50	23	23	23	Signifikanzniveau		0.01
29					4									50	29	29	29			8
73														50	73	73	73
55						Signifikanz-Wahrsch.		0.0702008			0.0597788			50	55	55	55
59		=>	Kritischer	55.3826							120			50	59	59	59
71			Wert			Signifikanzniveau		0.1						50	71	71	71
52											TTEST			50	52	52	52
55											0.0702008			50	55	55	55
63						Nullhypothese		ablehnen						50	63	63	63
78														50	78	78	78
71														50	71	71	71

## Sheet: Simulation3
Hypothesentest: Unbekannte Verteilung, große Stichprobe											Umrechng.			Variante 1
Stichprobe												1.28155		Variante 2	Stichprobe	Stichprobe	Stichprobe	H0:	Mittelwert =	50
X	H0:	Mittelwert	50	n	36		58.6111				KI-Y-Achse			Variante 3	X	X	X	Signifikanzniveau		0.1
62	Signifikanzniveau		0.1			s	16.8833				0	0			62	62	62			8
58												ablehnen	nicht ablehnen		58	58	58	H0:	Mittelwert =	50
52	Grenze des Ablehnungsbereichs					Testgröße					1				52	52	52	Signifikanzniveau		0.05
32															32	32	32			8
67			50	1.28155	16.8833										67	67	67	H0:	Mittelwert =	50
23		=						3.06023							23	23	23	Signifikanzniveau		0.01
29					6										29	29	29			8
73											0.0011059				73	73	73
55						Signifikanz-Wahrsch.		0.0011059							55	55	55
59		=>	Kritischer	53.6061							120				59	59	59
71			Wert			Signifikanzniveau		0.1							71	71	71
52															52	52	52
55															55	55	55
63						Nullhypothese		ablehnen							63	63	63
78															78	78	78
71															71	71	71
23															23	23	23
29															29	29	29
73															73	73	73
55															55	55	55
59															59	59	59
71															71	71	71
52															52	52	52
55															55	55	55
63															63	63	63
78															78	78	78
71															71	71	71
59															59	59	59
47															47	47	47
33															33	33	33
59															59	59	59
88															88	88	88
89															89	89	89
66															66	66	66
69															69	69	69
71															71	71	71

## Sheet: Simulation4
Hypothesentest: Normalverteilung, bekannte Varianz											Umrechng.			Variante 1
Stichprobe												1.28155		Variante 2	Stichprobe	Stichprobe	Stichprobe	H0:	Mittelwert =	50
X	H0:	Mittelwert	50	n	16		48.75				KI-Y-Achse			Variante 3	X	X	X	Signifikanzniveau		0.1
52	Signifikanzniveau		0.1				8				0	0			52	52	52			8
58												ablehnen	nicht ablehnen		58	58	58	H0:	Mittelwert =	50
52	Grenze des Ablehnungsbereichs					Testgröße					0				52	52	52	Signifikanzniveau		0.05
32															32	32	32			8
51			50	1.28155	8										51	51	51	H0:	Mittelwert =	50
31		=						-0.625							31	31	31	Signifikanzniveau		0.01
36					4						GTEST				36	36	36			8
41											0.265985				41	41	41
55						Signifikanz-Wahrsch.		0.265985			0.734015				55	55	55
59		=>	Kritischer	47.4369							-10				59	59	59
71			Wert			Signifikanzniveau		0.1							71	71	71
52															52	52	52
55															55	55	55
46						Nullhypothese		nicht ablehnen							46	46	46
42															42	42	42
47															47	47	47

## Sheet: Simulation5
Hypothesentest: Normalverteilung, unbekannte Varianz (t-Test)											Umrechng.			Variante 1
Stichprobe												1.34061		Variante 2	Stichprobe	Stichprobe	Stichprobe	H0:	Mittelwert =	50
X	H0:	Mittelwert	50	n	16		48.75				KI-Y-Achse			Variante 3	X	X	X	Signifikanzniveau		0.1
52	Signifikanzniveau		0.1			s	10.5672				0	0		50	52	52	52			8
58												ablehnen	nicht ablehnen	50	58	58	58	H0:	Mittelwert =	50
52	Grenze des Ablehnungsbereichs					Testgröße					0			50	52	52	52	Signifikanzniveau		0.05
32														50	32	32	32			8
51			50	1.34061	10.5672									50	51	51	51	H0:	Mittelwert =	50
31		=						-0.47316						50	31	31	31	Signifikanzniveau		0.01
36					4									50	36	36	36			8
41														50	41	41	41
55						Signifikanz-Wahrsch.		0.321455			0.318049			50	55	55	55
59		=>	Kritischer	46.4584							-10			50	59	59	59
71			Wert			Signifikanzniveau		0.1						50	71	71	71
52											TTEST			50	52	52	52
55											0.321455			50	55	55	55
46						Nullhypothese		nicht ablehnen						50	46	46	46
42														50	42	42	42
47														50	47	47	47

## Sheet: Simulation6
Hypothesentest: Unbekannte Verteilung, große Stichprobe											Umrechng.			Variante 1
Stichprobe												1.28155		Variante 2	Stichprobe	Stichprobe	Stichprobe	H0:	Mittelwert =	50
X	H0:	Mittelwert	50	n	36		46.4167				KI-Y-Achse			Variante 3	X	X	X	Signifikanzniveau		0.1
55	Signifikanzniveau		0.1			s	9.26553				0	0			55	55	55			8
48												ablehnen	nicht ablehnen		48	48	48	H0:	Mittelwert =	50
52	Grenze des Ablehnungsbereichs					Testgröße					1				52	52	52	Signifikanzniveau		0.05
32															32	32	32			8
51			50	1.28155	9.26553										51	51	51	H0:	Mittelwert =	50
31		=						-2.32043							31	31	31	Signifikanzniveau		0.01
36					6										36	36	36			8
41															41	41	41
55						Signifikanz-Wahrsch.		0.0101588			0.989841				55	55	55
39		=>	Kritischer	48.021							-10				39	39	39
31			Wert			Signifikanzniveau		0.1							31	31	31
52															52	52	52
55															55	55	55
46						Nullhypothese		ablehnen							46	46	46
42															42	42	42
47															47	47	47
52															52	52	52
58															58	58	58
52															52	52	52
32															32	32	32
51															51	51	51
31															31	31	31
36															36	36	36
41															41	41	41
55															55	55	55
59															59	59	59
71															71	71	71
52															52	52	52
55															55	55	55
46															46	46	46
42															42	42	42
47															47	47	47
42															42	42	42
47															47	47	47
42															42	42	42
47															47	47	47

## Sheet: Tabelle
62
58
52
32			0.000889093
67
23
29
73
55
59
71
52
55
63
78
71
