# Supplementary material
Source: publisher site journal article supplement (https://www.degruyterbrill.com/publication/isbn/9783486710663/downloadAsset/9783486710663_Anwendungen--de.zip)
Supplement: Supplementary file 99 [file A_2603_Anteilswert-Tests_zweiseitig.xls]

## Sheet: Simulation1
Hypothesentest: Normalverteilung, bekannte Varianz											Umrechng.
Stichprobe												1.64485
X		n	16		60.1875	H0:	Mittelwert =	40			KI-Y-Achse
85			0.1		30						0	0
98											Ablehnung	ablehnen	nicht ablehnen
72	Ablehnungsbereich										1
85
75				40	1.64485	30
64			=
81						4
68
38
5		Kritischer	27.6636	Kritischer	52.3364		Null-	ablehnen			-10	120
40		Wert unten		Wert oben			hypothese
18
75
87
66
6

## Sheet: Simulation2
Hypothesentest: Normalverteilung, unbekannte Varianz (t-Test)											Umrechng.
Stichprobe												2.94673
X		n	16		37.125	H0:	Mittelwert =	40			KI-Y-Achse
15			0.01	s	32.8428						0	0
6											Ablehnung	ablehnen	nicht ablehnen
42	Ablehnungsbereich										0
12
32				40	2.94673	32.8428
19			=
84						4
68
85
42		Kritischer	15.8053	Kritischer	64.1947		Null-	nicht ablehnen			-10	120
12		Wert unten		Wert oben			hypothese
80
86
1
2
8

## Sheet: Simulation
Hypothesentest: Anteilswert (zweiseitig)											Umrechng.			Variante 1	po	0.27477	n	200	pq	0.25
												1.95996		Variante 2	alpha	0.05
	H0:	Anteilswert =	0.27477	n	200		0.25				KI-Y-Achse			Variante 3	po	0.27477	n	250	pq	0.3
	Signifikanzniveau		0.05								0	0			alpha	0.05
												ablehnen	nicht ablehnen		po	0.27477	n	180	pq	0.35
	Grenze des Ablehnungsbereichs										0				alpha	0.05
											50	0
				0.27477	1.95996	0.1875					150	Achtung: Normalverteilung???
			=
						199
		Kritischer	0.214608	Kritischer	0.334932		Null-	nicht ablehnen			-10	120
		Wert unten		Wert oben			hypothese
