# Supplementary material
Source: publisher site journal article supplement (https://www.degruyterbrill.com/publication/isbn/9783486710663/downloadAsset/9783486710663_Anwendungen--de.zip)
Supplement: Supplementary file 100 [file A_2604_Anteilswert-Tests_einseitig.xls]

## Sheet: Simulation1
Hypothesentest: Anteilswert											Umrechng.			Variante 1	po	0.05	n	400	pq	0.052
												1.64485		Variante 2	alpha	0.05
	H0:	Anteilswert	0.05	n	400		0.052				KI-Y-Achse			Variante 3	po	0.05	n	400	pq	0.07
	Signifikanzniveau		0.05								0	0			alpha	0.05
												ablehnen	nicht ablehnen		po	0.05	n	400	pq	0.07
	Grenze des Ablehnungsbereichs														alpha	0.01
											20.8	0
				0.05	1.64485	0.0475					379.2	Achtung: Normalverteilung???
			=
						400
				Kritischer	0.0679244		Null-	nicht ablehnen			-0.1	1.5
				Wert oben			hypothese

## Sheet: Simulation2
Hypothesentest: Anteilswert											Umrechng.			Variante 1	po	0.1	n	300	pq	0.07
												1.28155		Variante 2	alpha	0.1
	H0:	Anteilswert	0.1	n	300		0.07				KI-Y-Achse			Variante 3	po	0.1	n	300	pq	0.07
	Signifikanzniveau		0.1								0	0			alpha	0.05
												ablehnen	nicht ablehnen		po	0.1	n	300	pq	0.07
	Grenze des Ablehnungsbereichs														alpha	0.01
											21	0
				0.1	1.28155	0.09					279	Achtung: Normalverteilung???
			=
						300
		Kritischer	0.0778029				Null-	ablehnen			-0.1	1.5
		Wert unten					hypothese
