# Supplementary material
Source: publisher site journal article supplement (https://www.degruyterbrill.com/publication/isbn/9783486710663/downloadAsset/9783486710663_Anwendungen--de.zip)
Supplement: Supplementary file 101 [file A_2605_Chi-Quadrat-Test_Anpassung.xls]

## Sheet: Simulation
Chi-Quadrat-Anpassungstest												Verteilung	signifikant	Frh-grade	Variante 1	0.05	0.05	0.05
X		xj	Beobachtete	Erwartete	fj - ej	(fj - ej)2/ej						Verteilung	nicht signifikant	5	Variante 2	beob.	beob.	beob.	erw.	erw.	erw.
			Häufigkeit fj	Häufigkeit ej								Nullhypothese	nicht ablehnen		Variante 3	Häufigk.	Häufigk.	Häufigk.	Häufigk.	Häufigk.	Häufigk.
x1		1	12	20	-8	3.2						Nullhypothese	ablehnen			12	20	10	20	20	20
x2		2	17	20	-3	0.45						0				17	21	11	20	20	20
x3		3	22	20	2	0.2						Achtung: Nicht alle erwarteten Häufigkeiten sind größer gleich 5!				22	20	13	20	20	20
x4		4	23	20	3	0.45										23	24	15	20	20	20
x5		5	17	20	-3	0.45										17	22	17	20	20	20
x6		6	29	20	9	4.05										29	20	20	20	20	20
Summe			120	120	0	8.8
	0.05		Kritischer Wert	11.0705	Nullhypothese	Verteilung
Sign.- Wahrsch.	0.117312		Wert Testgröße	8.8	nicht ablehnen	signifikant
