# Supplementary material
Source: publisher site journal article supplement (https://www.degruyterbrill.com/publication/isbn/9783486710663/downloadAsset/9783486710663_Anwendungen--de.zip)
Supplement: Supplementary file 102 [file A_2606_Chi-Quadrat-Test_Unabhngigkeit.xls]

## Sheet: Simulation1
Chi-Quadrat-Unabhängigkeitstest: 4-Felder-Tafel												Zusammenhang	nicht signifikant	Frh-grade	Variante 1	0.05	Achtung: Nicht alle erwarteten Häufigkeiten sind größer gleich 5!
Beobachtete Häufigkeiten					Erwartete Häufigkeiten							Zusammenhang	signifikant	1	Variante 2	0.05	0
	Y	y1	y2	Summe		Y	y1	y2	Summe			Nullhypothese	nicht ablehnen		Variante 3	0.05
X					X							Nullhypothese	ablehnen
x1		58	39	97	x1		45.59	51.41	97			Tab-Vollständigk.	1			58	39	37	44	43	69
x2		36	67	103	x2		48.41	54.59	103				1			36	67	53	39	38	83
Summe		94	106	200	Summe		94	106	200				1
												4	1
	0.05		Kritischer Wert		3.84146	Nullhypothese		Zusammenhang				CHIVERT
Sign.- Wahrsch.	0.000434818		Wert Testgröße		12.3769	ablehnen		signifikant				0.000434677
Fr.grade	1

## Sheet: Simulation2
Chi-Quadrat-Unabhängigkeitstest: 9-Felder-Tafel														Zusammenhang	nicht signifikant	Frh-grade	Variante 1	0.05	Achtung: Nicht alle erwarteten Häufigkeiten sind größer gleich 5!
Beobachtete Häufigkeiten						Erwartete Häufigkeiten								Zusammenhang	signifikant	4	Variante 2	0.05	0
	Y	y1	y2	y3	Summe		Y	y1	y2	y3	Summe			Nullhypothese	nicht ablehnen		Variante 3	0.05
X						X								Nullhypothese	ablehnen
x1		18	9	5	32	x1		11.0345	10.6667	10.2989	32			Berechnung Freiheitsgrade		1	0.000311616	18	9	5
x2		3	14	7	24	x2		8.27586	8	7.72414	24					2		3	14	7
x3		9	6	16	31	x3		10.6897	10.3333	9.97701	31					2		9	6	16
Summe		30	29	28	87	Summe		30	29	28	87					4		21	22	23
														CHIVERT		4		26	28	27
	0.05			Kritischer Wert		9.48773	Nullhypothese		Zusammenhang					0.000311616				32	38	39
Sign.- Wahrsch.	0.000311616			Wert Testgröße		21.0352	ablehnen		signifikant					4.39698	0.260417	2.72631	21.0352	20	20	20
Fr.grade	4													3.36336	4.5	0.0678879		15	15	15
														0.267075	1.8172	3.636		18	18	18
