# Supplementary material
Source: publisher site journal article supplement (https://www.degruyterbrill.com/publication/isbn/9783486710663/downloadAsset/9783486710663_Anwendungen--de.zip)
Supplement: Supplementary file 103 [file A_2607_F-Test.xls]

## Sheet: Simulation
F-Test für Regressionsgeraden																									Variante 1
i	xi	yi	Grund der Variation			Quadratsummen		Freiheitsgrade		Mittl. quadr. Abweichung															Variante 2	xi	yi	xi	yi	xi	yi
			X			25.4309		1		25.4309					Nullhypothese ablehnen			xi2	yi2	xiyi	y-dach				Variante 3
1	36	1.8	Rest			14.9558		10		1.49558					Nullhypothese nicht ablehnen			1296	3.24	64.8	3.58151	-1.78151	3.17377	0.616476		36	1.8	20	1	20	9
2	40	3.9	Summe			40.3867		11		3.67152					Zusammenhang signifikant			1600	15.21	156	4.0774	-0.177397	0.0314698	0.0836768		40	3.9	25	2	25	9
3	25	3.8													Zusammenhang nicht signifikant			625	14.44	95	2.21781	1.58219	2.50333	4.61759		25	3.8	40	3	25	8
4	24	1.9		F(0,975)-Quantil			6.93672	Testgröße =			17.0041							576	3.61	45.6	2.09384	-0.193836	0.0375722	5.16576		24	1.9	55	4	30	8
5	60	6.9		Nullhypothese ablehnen				Zusammenhang signifikant										3600	47.61	414	6.55685	0.343151	0.117752	4.7969		60	6.9	60	5	35	7
6	40	6.2																1600	38.44	248	4.0774	2.1226	4.50544	0.0836768		40	6.2	70	6	40	7
7	53	6.8																2809	46.24	360.4	5.68904	1.11096	1.23423	1.74867		53	6.8	60	1	40	6
8	52	5.5																2704	30.25	286	5.56507	-0.0650685	0.00423391	1.43617		52	5.5	40	2	45	5
9	40	2.4																1600	5.76	96	4.0774	-1.6774	2.81366	0.0836768		40	2.4	40	3	50	5
10	62	6.4														Korr.-K.	0.793527	3844	40.96	396.8	6.80479	-0.404795	0.163859	5.94447		62	6.4	30	4	55	4
11	35	3														B-Maß	0.629686	1225	9	105	3.45753	-0.457534	0.209338	0.826522		35	3	20	5	60	3
12	41	3.8														Achse	-0.881507	1681	14.44	155.8	4.20137	-0.40137	0.161098	0.027323		41	3.8	10	6	65	2
Summe	508	52.4														Steigung	0.123973	23160	269.2	2423.4		3.10862e-15	14.9558	25.4309
		Korrel-K.
		0.793527
