# Supplementary material
Source: publisher site journal article supplement (https://www.degruyterbrill.com/publication/isbn/9783486710663/downloadAsset/9783486710663_Anwendungen--de.zip)
Supplement: Supplementary file 104 [file A_2608_Zwei-Stichproben-t-Test.xls]

## Sheet: Simulation
Zwei-Stichproben-t-Test: Normalverteilung, unbekannte Varianz													Umrechng.			Zweistichproben t-Test unter der Annahme unterschiedlicher Varianzen			Variante 1	0	0.05	0	0.05	0	0.01
1.Stichpr.	2.Stichpr.							1. Stichpr.	2. Stichpr.	Differenz				2.04227					Variante 2	1.Stichpr.	2.Stichpr.	1.Stichpr.	2.Stichpr.	1.Stichpr.	2.Stichpr.
X1	X2	H0:	Mittelwert-Differenz =		0			43.625	40.9375	2.6875			KI-Y-Achse				Variable 1	Variable 2	Variante 3	X	X	X	X	X	X
50	50	Signifikanzniveau			0.05	s		6.15224	6.14783			50	0	0		Mittelwert	43.625	40.9375		50	50	61	32	61	32
48	44					n		16	16			48	Ablehnung	ablehnen	nicht ablehnen	Varianz	37.85	37.7958		48	44	57	23	57	23
39	37											39	0			Beobachtungen	16	16		39	37	39	37	39	37
37	33	Testgröße => t-Wert										37		signifikant	nicht signifikant	Hypothetische Differenz der Mittelwerte	0			37	33	37	33	37	33
48	48											48				Freiheitsgrade (df)	30			48	48	48	48	48	48
50	48				43.625	40.9375		0				50				t-Statistik	1.23599			50	48	50	48	50	48
44	44									1.23599		44				P(T<=t) einseitig	0.113026			44	44	44	44	44	44
29	29											29				Kritischer t-Wert bei einseitigem t-Test	1.69726			29	29	29	29	29	29
36	36					37.85		37.7958				36				P(T<=t) zweiseitig	0.226052			36	36	36	36	36	36
46	41						+					46	-10	120		Kritischer t-Wert bei zweiseitigem t-Test	2.04227			46	41	46	41	46	41
42	42					16		16				42				Zweistichproben t-Test unter der Annahme gleicher Varianzen				42	42	42	42	42	42
47	34											47								47	34	47	34	47	34
47	42											47					Variable 1	Variable 2		47	42	47	42	47	42
48	44											48				Mittelwert	43.625	40.9375		48	44	48	44	48	44
38	36	Signifikanz-Wahrsch.		0.226052	Null-	nicht ablehnen			Differenz	nicht signifikant		38				Varianz	37.85	37.7958		38	36	38	36	38	36
49	47	für Test-Wert			hypothese											Beobachtungen	16	16		49	47	49	47	49	47
																Gepoolte Varianz	37.8229
																Hypothetische Differenz der Mittelwerte	0
																Freiheitsgrade (df)	30
																t-Statistik	1.23599
																P(T<=t) einseitig	0.113026
																Kritischer t-Wert bei einseitigem t-Test	1.69726
																P(T<=t) zweiseitig	0.226052
																Kritischer t-Wert bei zweiseitigem t-Test	2.04227
